1 Climate change impacts on the abiotic degradation of  
2 acyl-homoserine lactones in the fluctuating conditions of  
3 marine biofilms

4 Christina C. Roggatz<sup>1</sup>, Daniel R. Parsons<sup>1</sup>

5 <sup>1</sup>Energy and Environment Institute, University of Hull, HU6 7RX, UK

6 **Abstract**

7 Marine biofilms are functional communities that shape habitats by providing a  
8 range of structural and functional services integral to coastal ecosystems. Impacts  
9 of climate change on biological aspects of such communities are increasingly studied,  
10 but impacts on the chemicals that mediate key interactions of biofilm organisms have  
11 largely been overlooked. Acyl-homoserine lactones (AHLs), crucial bacterial signals  
12 within biofilms, are known to degrade through pH and temperature-dependent hy-  
13 drolysis. However, the impact of climate change on AHLs and thus on biofilm form  
14 and function is presently unknown. This study investigates the impact of changes  
15 in pH and temperature on the hydrolysis rate, half-life time and quantitative abun-  
16 dance of different AHLs on daily and seasonal timescales for current conditions and  
17 future climate change scenarios.

18 We established the mathematical relationships between pH, hydrolysis rates/ half-  
19 life times and temperature, which revealed that natural daily pH-driven changes  
20 within biofilms cause the greatest fluctuations in AHL concentration (up to 9-fold).  
21 Season-dependant temperature enhanced or reduced the observed daily dynamics,  
22 leading to higher winter and lower summer concentrations and caused a shift in  
23 timing of the highest and lowest AHL concentration by up to two hours. Simulated  
24 future conditions based on climate change projections caused an overall reduction of  
25 AHL degradation and led to higher AHL concentrations persisting for longer across  
26 both the daily and seasonal cycles.

27 This study provides valuable quantitative insights into the theoretical natural dy-  
28 namics of AHL concentrations. We highlight critical knowledge gaps on the scale of  
29 abiotic daily and seasonal fluctuations affecting estuarine and coastal biofilms and  
30 on the biofilms' buffering capacity. Detailed experimental studies of daily and sea-  
31 sonal dynamics of AHL concentrations and assessment of the potential implications  
32 for a suite of more complex interactions are required. Substantial fluctuations like  
33 those we show in this study, particularly with regards to concentration and timing,  
34 will likely have far reaching implications for fundamental ecosystem processes and  
35 important ecosystem services such as larval settlement and coastal sediment stabil-  
36 isation.

37  
38 **Keywords:** pH-sensitive signal, quantitative assessment, environmental impact,  
39 AHL hydrolysis, biofilm, quorum sensing, cell-cell signals, chemical communication

## 40 1 INTRODUCTION

41 Climate change caused by anthropogenic carbon dioxide (CO<sub>2</sub>) emissions is predicted  
42 to significantly change the physical and chemical parameters of our waterbodies across  
43 Earth. Assuming a business-as-usual scenario (RCP 8.5), ocean surface pH is predicted  
44 to drop by 0.4 pH units until the end of this century, a process called ocean acidification  
45 [1]. In the same timeframe, sea surface temperature is predicted to rise by more than  
46 4°C [1]. While the range of change is within conditions previously experienced on Earth,  
47 the rate of change is unprecedented, with severe impacts on the form and function of  
48 the environment and organisms becoming apparent.

49 One recently discovered effect of ocean acidification on the biosphere is that it can  
50 severely affect the molecular properties of chemical signals that mediate the interactions  
51 of marine organisms and their daily life [2]. An average change of 0.4 pH units was  
52 found to render peptides involved in crab brood-care non-functional [2] and impair her-  
53 mit crabs in their ability to locate food effectively, likely due to the same reason [3].  
54 Fishes such as sea bass and sea bream also show significant reduction in their ability  
55 to receive chemical signals in reduced pH conditions [4, 5]. When a chemical signal is  
56 transported from the source or sender to the receiving organisms, it is subject to the  
57 environmental conditions within which it is transported and will therefore inevitably be  
58 affected by the surroundings. Climate driven changes to these surroundings will thus  
59 likely have a suite of poorly understood impacts on signal used for chemical communi-  
60 cations between organisms.

61 Biofilms are ubiquitously distributed worldwide within estuarine and coastal settings,  
62 providing a range of structural and functional services that are integral to coastal ecosys-  
63 tems and morphological stability [6, 7]. N-acyl-homoserine lactones (AHLs) are key  
64 signalling molecules used by bacteria in cell-cell communication and play a crucial role  
65 in biofilm formation and the production of extracellular polymeric substances (EPS)  
66 [8]. The importance of these signals in marine, estuarine and coastal microbial mats  
67 and biofilms, however, only came into focus in the past 20 years. In 2002, the produc-  
68 tion of AHLs within *Roseobacter* and *Marinobacter* strains isolated from marine snow  
69 was reported for the first time [9]. Since then a variety of AHL producing microorgan-  
70 isms, mainly gram-negative bacteria, have been isolated from marine biofilms [10, 11]  
71 (and references therein). Due to the very low concentration of AHLs in environmental  
72 samples, only few studies managed to identify and quantify these compounds directly.  
73 Decho *et al.* extracted, identified and quantified nine different AHLs from stromatolite  
74 microbial mats, of which C6-, C8- and C10-HSL were particularly abundant [12]. Tait  
75 and co-workers were able to extract AHLs from rock-pool pebble-biofilms averaging a  
76 concentration of approximately 600 pmol cm<sup>-2</sup> and found C8- and C10-HSL to domi-  
77 nate [13]. More recently, AHLs were also quantified in intertidal marine sediments with  
78 C8-, C10- and C12-HSL dominating the profile [14]. Besides their presence in marine  
79 bacterial biofilms, where AHLs mediate the bacteria-bacteria interactions via quorum  
80 sensing, it was shown that AHLs are further involved in a number of cross-kingdom  
81 interactions [15]. C10-HSL, its 3-oxo and 3-OH forms, have been found to mediate inter-

82 actions between benthic diatoms and bacteria [16] while a range of AHLs from C6-HSL  
 83 to C14-HSL and their hydroxyl- and oxo-forms were found to act as attractants for larvae  
 84 of macro algae [17, 18] and biofouling or bioturbating fauna [19] (and references therein)  
 85 (see Fig. 1A for an overview of AHL-mediated interactions).

86

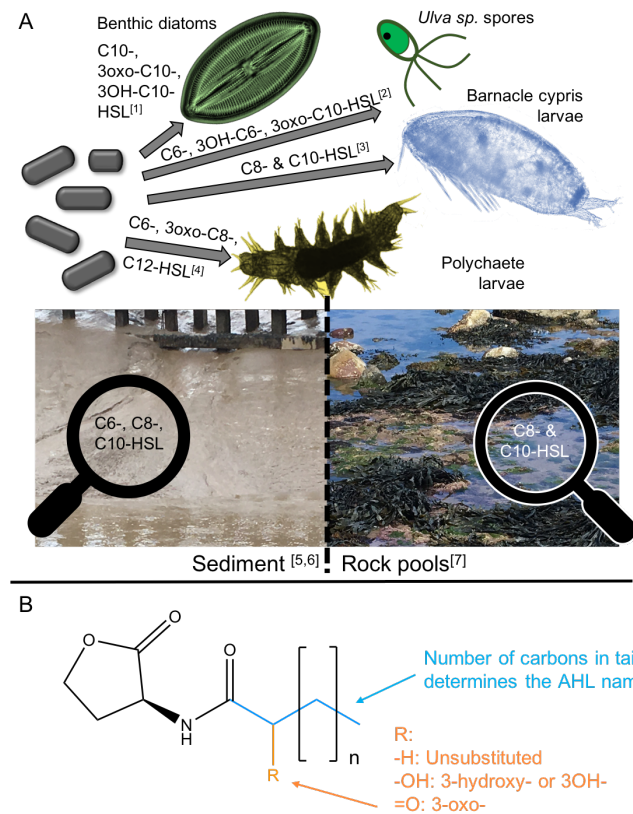

**Figure 1: Overview of AHL-mediated interactions, their presence in different environments and their basic chemical structure.** Panel A gives an overview of bacterial AHLs that are known to mediate interactions with selected algae and invertebrates, and indicates important AHLs for different marine habitats. Panel B shows the basic structure of AHLs and explains the nomenclature with the number of carbons in the blue tail giving the name and the substitution at R in orange determining the AHL class. References: [1] Yang *et al.* [16], [2] Joint *et al.* [18], [3] Tait & Havenhand [19] and [4] Huang *et al.* [20], [5] Decho *et al.* [12], [6] Stock *et al.* [14] and [7] Tait *et al.* [13].

87 All N-acyl-homoserine lactones follow a common structure consisting of a homoserine  
 88 lactone ring, which is N-acylated with a fatty acyl group at the  $\alpha$ -position [21]. The  
 89 fatty acid group can be of variable acyl chain lengths (usually 4 to 18 carbons), satura-  
 90 tion levels and oxidation states, belonging to either the N-acyl, N-(3-oxoacyl) or N-(3-  
 91 hydroxyacyl) class (see Fig. 1B). [21] In this study, names of AHLs are abbreviated in

92 the common way by using C<sub>x</sub> or C<sub>x</sub>-HSL (interchangeably) with x = number of car-  
93 bons. Importantly, this structure makes AHLs susceptible to change with pH. In fact,  
94 only AHLs with chain lengths of C ≥ 4 persist long enough to convey a signal [22, 23].  
95 The pH-dependent, base-catalysed hydrolysis of the lactone ring transforms the AHL  
96 into the corresponding N-acylhomoserine, which no longer functions as a chemical signal  
97 [22, 24]. This reaction is further accelerated by increasing temperatures [22]. AHLs  
98 are therefore assumed to be short-lived signalling cues, especially those with short side  
99 chains of six carbons or less, which degrade quickly in marine environments with pH > 7.  
100 [25] Degradation of AHLs in seawater was established experimentally by Tait *et al.* [17]  
101 and Hmelo & Van Mooy [23] for AHLs with a range of chain lengths and substitutions.  
102 Decho and coworkers went one step further and measured the pH profile within micro-  
103 bial mats under natural conditions and then experimentally quantified the half-life time  
104 of some AHLs in different pH conditions during laboratory studies. They established a  
105 significant degradation of the shorter chain AHLs in the laboratory and in the natural  
106 microbial mat during daytime in the field, and subsequently linked their observations  
107 to the significant daily pH fluctuations they observed within the biofilm. [12] However,  
108 despite numerous publications highlighting and studying the influence of environmental  
109 physical parameters on AHL signalling in general, the impact of naturally fluctuating  
110 abiotic conditions within and in the surrounding of biofilms remains undetermined, as  
111 highlighted by Decho & Gutierrez [26] as well as Hmelo [25] in recent reviews. The im-  
112 pacts of seasonal variations, and/ or climate change scenarios, have not been addressed  
113 to date.

114 This study therefore investigates the impact of changes in pH and temperature on the  
115 quantitative abundance of different AHLs for daily and seasonal conditions in the context  
116 of current and future climate change scenarios. First, the mathematical relationships  
117 between pH and each specific AHL hydrolysis rate  $k$  and half-life time  $t_{1/2}$  as well as  
118 the influence of temperature on  $k$  and  $t_{1/2}$  are established. Then the change in AHL hy-  
119 drolysis rate, half-life time and relative concentration is calculated for daily fluctuations  
120 within the biofilm, for seasonal variations of conditions and for average ocean conditions  
121 based on climate change projections. Finally, the scale of influence through natural  
122 fluctuations and changes due to climate change are compared and the implications for  
123 interactions mediated through AHLs are discussed in terms of the ecosystem services  
124 and stability of coastal and estuarine systems.

## 125 2 MATERIALS & METHODS

### 126 2.1 AHL hydrolysis kinetics and pH

127 The degradation of AHL due to hydrolysis in water (also called lactonolysis) follows a  
128 pseudo first-order reaction. For the neutral and alkaline hydrolysis of interest in the  
129 context of this study, the reaction follows a B<sub>AC</sub>2 mechanism as described by Gómez-  
130 Bombarelli and colleagues [27]. The reaction can be described as

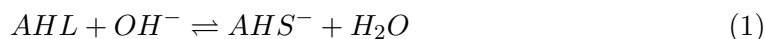



131 where AHL stands for N-acyl-homoserine lactone and AHS for the corresponding N-acyl  
132 homoserine. With the reaction taking place in water, the hydrolysis rate  $k$  at any given  
133 condition can be calculated as:

$$k = \frac{[AHS^-]}{[AHL]} \quad (2)$$

134 following the pseudo-first order as shown by Ziegler *et al.* [28]. The hydrolysis rate  $k$   
135 can further be converted into half-life time  $t_{1/2}$  using

$$t_{1/2} = \frac{\ln(2)}{k} \quad (3)$$

136 However, the hydrolysis rate and half-life time of AHLs are molecule-specific and further  
137 dependent on pH, temperature and the length of their alkyl-chain [22].

### 138 2.1.1 Dependence of the hydrolysis rate $k$ on pH

139 As can be seen from eqn. (1), the concentration of hydroxide anions ( $[OH^-]$ ) and there-  
140 fore pH plays a central part in the hydrolysis of AHLs. Limited  $[OH^-]$  will slow hy-  
141 drolysis down while higher concentrations or even excess of  $[OH^-]$  will accelerate the  
142 ring-opening reaction. In order to obtain a general mathematical relationship for the  
143 dependency of  $k$  on pH, we formulate the pH-dependent rate  $k_{pH}$  based on eqn. (1) as

$$k_{pH} = \frac{[AHS^-][H_2O]}{[AHL][OH^-]} \quad (4)$$

144 The concentration of hydroxide anions is linked to pH through

$$pOH = 14 - pH \quad (5)$$

145 and

$$pOH = -\log[OH^-] \quad (6)$$

146 so

$$[OH^-] = 10^{-pOH} \quad (7)$$

$$= 10^{-(14-pH)} \quad (8)$$

$$= 10^{-14} \times 10^{pH} \quad (9)$$

147 Considering in this context  $[H_2O] = 10^{-14}$  and substituting  $[H_2O]$  and  $[OH^-]$  into eqn.  
148 (4) yields

$$k_{pH} = \frac{[AHS^-] \times 10^{-14}}{[AHL] \times 10^{-14} \times 10^{pH}} \quad (10)$$

$$= \frac{[AHS^-]}{[AHL]} \times 10^{-pH} \quad (11)$$

149 which can then be expressed as a linear relationship by multiplying with the negative  
150 decadic logarithm

$$-\log(k_{\text{pH}}) = \frac{[\text{AHS}^-]}{[\text{AHL}]} \times \text{pH} \quad (12)$$

151 to describe the link between the AHL/AHS ratio and pH.

152

153 In order to establish the AHL-specific coefficients for this equation, the data pub-  
154 lished by Ziegler *et al.* [28] has been used, who measured the pH-specific hydrolysis  
155 rates of C4, C6, C8, C6-oxo and C8-oxo by  $^1\text{H}$  NMR spectroscopy in  $\text{D}_2\text{O}$  at pH 7.0,  
156 7.9, 9.2 and 9.5 at room temperature ( $22^\circ\text{C}$ ). The rates were plotted as negative decadic  
157 logarithm versus the pH in IGOR pro (v6.37) and a linear least-square fit function was  
158 obtained. The slope of the fit function represents the  $\frac{[\text{AHS}^-]}{[\text{AHL}]}$  coefficient, which can sub-  
159 sequently be used to calculate the AHL-specific  $k_{\text{pH}}$  at any given pH.

160 The same analysis was performed for data obtained by Decho *et al.* [12], who published  
161 the half-life time of C6, C8, C10, C12 and C14 at pH 6.18, 7.2, 8.2, 8.7 and 9.55 recorded  
162 at  $26^\circ\text{C}$ . The  $t_{1/2}$  data was converted into  $k$  using eqn. (3) and analysed as described  
163 above.

164

### 165 2.1.2 Dependence of the half-life time $t_{1/2}$ on pH

166 For the dependence of the AHL-specific half-life time  $t_{1/2}$  on pH, a similar relationship  
167 as for the hydrolysis rate can be established by substituting eqn. (3) into eqn. (11).

$$\frac{\ln(2)}{t_{1/2}} = \frac{[\text{AHS}^-]}{[\text{AHL}]} \times 10^{-\text{pH}} \quad (13)$$

168 and rearranging to

$$\log(t_{1/2}) = \frac{[\text{AHL}]}{[\text{AHS}^-]} \times \frac{1}{\ln(2)} \times \text{pH} \quad (14)$$

169 Like for  $k_{\text{pH}}$ , the data sets by Ziegler *et al.* [28] and Decho *et al.* [12] were used. For  
170 consistency, all times were transformed to minutes.

## 171 2.2 AHL hydrolysis kinetics and temperature (T)

172 The impact of temperature on biological and chemical processes is often expressed  
173 through a temperature coefficient (mostly for steps of  $10^\circ\text{C}$ , hence  $Q_{10}$ ). It assumes,  
174 that the reaction rate (or in this study the hydrolysis rate  $k$ ) depends exponentially on  
175 the temperature T. For a  $1^\circ\text{C}$  temperature change,  $Q_1$  can be expressed as

$$Q_1 = \left(\frac{k_2}{k_1}\right)^{\frac{1}{T_2 - T_1}} \quad (15)$$

176 where  $k_1$  and  $k_2$  are the hydrolysis rates at two different temperatures,  $T_1$  and  $T_2$ ,  
177 respectively. The temperature step of  $1^\circ\text{C}$  is represented by the 1 in the exponential

178 fraction.

179 Based on the investigations of Yates *et al.* [22], who report the hydrolysis rates for C4,  
180 C6, C8 and C6-oxo at a stable pH and 22 or 37°C, the temperature coefficient per 1°C  
181 was calculated using eqn. (15).

### 182 **2.2.1 Dependence of the hydrolysis rate $k$ on T**

183 To account for the impact of temperature on the hydrolysis rate, the rates obtained  
184 for C4, C6, C8 and C6-oxo at any given pH were shifted to the desired temperature by  
185 multiplication with the coefficient according to the temperature difference. For example,  
186 to shift  $k$  of C6-HSL obtained at pH 8.2 and 26°C to a more relevant temperature of 16  
187 or 20°C,  $k$  was multiplied by  $Q_{-10}$  or  $Q_{-6}$ , respectively.

### 188 **2.2.2 Dependence of the half-life time $t_{1/2}$ on T**

189 For the influence of T on  $t_{1/2}$ , the same approach was taken based on the data of Yates  
190 *et al.* [22]. The reported relative hydrolysis rates were transformed into half-life times  
191 prior to the calculation of the  $t_{1/2}$ -influencing coefficient.

## 192 **2.3 Quantification of change to $k$ , $t_{1/2}$ and [AHL] for natural conditions** 193 **and climate change scenarios**

### 194 **2.3.1 Definition of relevant natural pH and temperature ranges**

195 Physical aquatic parameters, such as temperature and pH, fluctuate considerably in nat-  
196 ural environments like estuaries [29, 30]. Defining relevant pH and T ranges is therefore  
197 crucial. Although AHL-producing bacteria in biofilms are assumed to be well-buffered  
198 from the surroundings [31], pH conditions within the biofilm can vary considerably due  
199 to the presence of photosynthetic co-inhabitants such as diatoms [12] (and references  
200 therein). Decho *et al.* [12] showed that within the first millimetres of a marine biofilm,  
201 pH can fluctuate between an acidic pH 6.8 at night and alkaline pH of 9.4 during the  
202 day at a stable external pH. This pattern can be translated into a sinus function that  
203 represents pH over the course of a day:

$$pH_t = 1.3 \sin\left(\frac{2\pi}{24} \times (t - 11)\right) + 8.1 \quad (16)$$

204 with  $t$  specifying the hour of the day out of 24.

### 205 **2.3.2 Natural conditions in the Humber estuary**

206 Abiotic water parameters, such as pH and temperature, have been measured frequently  
207 over the past years within and surrounding the Humber estuary (UK). For this study  
208 the dataset for pH and temperature measured at Spurnpoint, Saltend Jetty and Albert  
209 Dock from 1995 to 2005 was used (available upon request from corr. author, will be  
210 made available for publication). Data was pooled and plotted with respect to the day

211 within the year it was obtained, before being analysed for apparent fluctuations. pH  
212 showed some variation (pH  $7.78 \pm 0.23$ ), but no clear temporal or spatial pattern is  
213 evident. Temperature data ( $11.15 \pm 4.86$  °C) showed a clear seasonal pattern and was  
214 subsequently fitted with a sinus function in IGORpro (v6.3).

### 215 **2.3.3 Relevant climate change scenarios**

216 Based on the latest IPCC report, global average surface ocean pH is currently assumed  
217 as pH 8.1 and predicted to drop by 0.4 units to pH 7.7 by the end of this century [1].  
218 Global average surface ocean temperature is currently at 16°C [32] and predicted to rise  
219 to 20°C by 2100 [1]. Assuming any average changes predicted with climate change would  
220 translate to the biofilm environment unaltered (i.e. cause a baseline shift), the natural  
221 pH conditions in the biofilm by the year 2100 could be shifted to range from 6.4 to 9.0  
222 and temperature could be increased by up to 4°C.

### 223 **2.3.4 Calculation of scenario-specific $k$ , $t_{1/2}$ and relative [AHL]**

224 For this part only the effects for C6 and C8 were evaluated as data for these two AHLs  
225 with regards to pH and temperature influences was most reliable. To account for po-  
226 tential experimental uncertainties, the hydrolysis rate and half-life time data for C6 and  
227 C8 obtained by Decho *et al.* [12] and Ziegler *et al.* [28] was combined after adjusting  
228 the NMR-based data of Ziegler and co-workers to the temperature used for Decho and  
229 co-workers' experiments (based on the temperature coefficients obtained through Yates  
230 *et al.* [22]) and accounting for the kinetic isotope effect (KIE) of D<sub>2</sub>O compared to  
231 water ( $\text{KIE} = \frac{k_{\text{H}_2\text{O}}}{k_{\text{D}_2\text{O}}} = 2$ ) by multiplying Ziegler's hydrolysis rates by 0.5 and the respec-  
232 tive half-life times by 2 [28]. The combined dataset was then plotted against pH and  
233 subjected to the analyses described above to obtain the respective linear correlation  
234 coefficients.

235 Then, for each specifically defined condition (e.g. each datapoint of the seasonal Hum-  
236 ber dataset or each combination of average climate change conditions), the pH and  
237 T-dependent hydrolysis rate  $k$  and the respective half-live time  $t_{1/2}$  were calculated  
238 based on eqn. (12) and (14) and the corresponding temperature coefficients based on  
239 (15). Differences between maximum, average and minimum of fluctuating conditions or  
240 between current and future average conditions were calculated and expressed in plain  
241 numbers as well as % (relative to average or current conditions). Monthly averages for  
242 seasonal variations were calculated and expressed as  $\pm$  standard error of mean (SEM).  
243 Seasonal trends for hydrolysis rate and half-life time across the year were analysed by  
244 fitting a sine function (IGORpro v6.3) based on the observations that temperature the  
245 is most influencing factor.

246 For each climate change scenario the AHL concentration over time (minutes) was cal-  
247 culated based on a classic exponential decay equation and assuming an AHL start con-  
248 centration of 1, so

$$[AHL]_t = 1 \times e^{-kt} \quad (17)$$

249 using the respective hydrolysis rate  $k$  adjusted for pH and T of the scenario in question.  
250 For the daily periodical fluctuations, a constant hourly production of  $[AHL] = 1$  was  
251 assumed and summing up all produced and from decay remaining hour-specific AHL  
252 concentrations (calculated based on eqn. (16)) yielded the overall relative  $[AHL]$  for  
253 each hour of the day.

### 254 3 RESULTS

#### 255 3.1 Numerical pH-dependence of hydrolysis rate and half-live time

256 For the investigated pH range between 6.0 and 10.0, there was a clear linear impact of  
257 pH on the hydrolysis rate when plotted at negative log-scale (Fig. 2). The same could  
258 be observed for half-life time (Fig. S1). With increasing pH,  $-\log(k)$  decreased, corre-  
259 sponding to an increase of the hydrolysis rate  $k$ . At lower pH conditions the hydrolysis  
260 rate is slower.

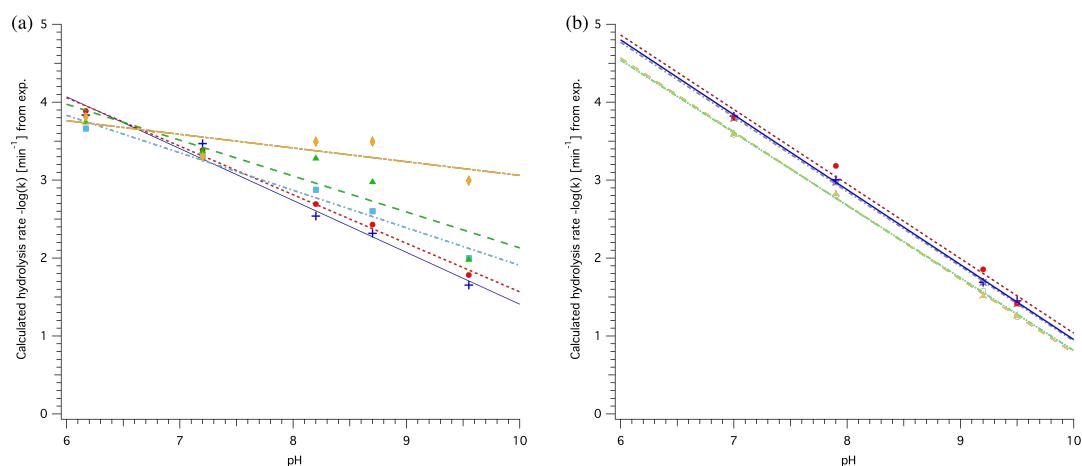

Figure 2: **pH-dependence of hydrolysis rate  $k$  for different AHLs.** (a) Based on data published by Decho *et al.* [12] for C6 (blue, cross), C8 (red, circles), C10 (light blue, squares), C12 (green, triangles) and C14 (orange, diamonds). (b) Based on data published by Ziegler *et al.* [28] for C4 (grey, star), C6 (blue, cross), C8 (red, circles), C6-oxo (orange, triangle) and C8-oxo (light green, open circles). Coefficients for linear least-square fit following the equation  $-\log(k) = a \times pH + C$  are detailed in Table 1.

261 The steeper slope observed for AHLs with shorter acyl-chain length based on the  
262 data by Decho *et al.* [12] indicates a greater impact of pH on the hydrolysis rate than  
263 for AHLs with longer acyl-chains with more than 8 carbons (see also slope coefficient  
264  $a$  in Table 1). For C10-HSL the slope was 0.14 lower than for C8-HSL, a significant  
265 reduction by more than 22%. In addition, an overall faster abiotic hydrolysis rate for  
266 shorter chain AHLs is reflected by the calculated  $k$  at pH 8.0 in Table 1. For AHLs  
267 with 8 carbons or less, the parameters are similar, suggesting a similar impact of pH and  
268 similar rate of abiotic hydrolysis (see (a) and (b) in Fig. 2). AHLs with a 3-oxo-group in

269 the side chain had a faster hydrolysis rate at each point across the pH range, but were  
 270 equally affected by pH (similar slope). It has to be noted that the least-square linear fit  
 271 obtained for C6, C8 and C10 data by Decho *et al.* [12] as well as for all data by Ziegler  
 272 *et al.* [28] was very good ( $R^2 > 0.95$ ), while the linear regression obtained for C12 and  
 273 C14 was not as good or even poor and the subsequently calculated data, such as  $k$  at  
 274 any pH, should be interpreted with caution. It also has to be taken into consideration  
 275 that rates obtained based on either dataset are only representative for the respective  
 276 conditions. While Decho *et al.* [12] obtained their rates in water at 26°C based on sub-  
 277 sequent GC-MS analyses in 0.5h steps, Ziegler *et al.* [28] performed NMR experiments  
 278 at 22°C in D<sub>2</sub>O and determined  $k$  based on sampling in steps of 4min. Hence the ob-  
 279 tained parameters for C6 and C8 by both groups are not directly comparable without  
 280 temperature and solvent adjustment.

281

**Table 1: Coefficients ( $\pm$  SD) of the relationship between hydrolysis rate  $k$  and pH**  
 expressed as linear equation of the form  $-\log(k) = a \times \text{pH} + C$ , valid for the pH range from 6.0  
 to 10.0.  $R^2$  expresses the goodness of fit of the linear regression.  $k$  at pH 8.0 calculated based on  
 fit equation and expressed as rate per minute.

| AHL    | $a$              | $C$            | $R^2$ | $k$ at pH 8.0<br>( $\times 10^{-3}$ ) [ $\text{min}^{-1}$ ] | Source data                       |
|--------|------------------|----------------|-------|-------------------------------------------------------------|-----------------------------------|
| C6     | -0.67 $\pm$ 0.06 | 8.1 $\pm$ 0.4  | 0.980 | 1.8                                                         | Decho <i>et al.</i><br>(2009)*    |
| C8     | -0.62 $\pm$ 0.03 | 7.8 $\pm$ 0.2  | 0.994 | 1.4                                                         |                                   |
| C10    | -0.48 $\pm$ 0.04 | 6.7 $\pm$ 0.4  | 0.975 | 1.4                                                         |                                   |
| C12    | -0.5 $\pm$ 0.1   | 6.7 $\pm$ 0.9  | 0.822 | 2.0                                                         |                                   |
| C14    | -0.18 $\pm$ 0.08 | 4.9 $\pm$ 0.7  | 0.592 | 0.3                                                         |                                   |
| C4     | -0.96 $\pm$ 0.01 | 10.5 $\pm$ 0.1 | 0.999 | 1.4                                                         | Ziegler <i>et al.</i><br>(2019)** |
| C6     | -0.96 $\pm$ 0.02 | 10.6 $\pm$ 0.2 | 0.999 | 1.2                                                         |                                   |
| C8     | -0.96 $\pm$ 0.07 | 10.6 $\pm$ 0.6 | 0.989 | 1.2                                                         |                                   |
| C6-oxo | -0.95 $\pm$ 0.02 | 10.2 $\pm$ 0.2 | 0.999 | 2.5                                                         |                                   |
| C8-oxo | -0.93 $\pm$ 0.02 | 10.2 $\pm$ 0.2 | 0.999 | 2.2                                                         |                                   |

\* in H<sub>2</sub>O at 26°C, \*\* in D<sub>2</sub>O at 22°C

282 For the half-life time the same linear impact of pH could be observed when plotted  
 283 at positive log-scale (Fig. S1). Increased pH results in a shorter half-life time, which is  
 284 also illustrated in Table 2. pH has a stronger effect on short acyl-chain AHLs, which  
 285 also have an overall shorter half-life, for example comparing C6, C8 and C10 at pH 8.0.  
 286 As half-life time and hydrolysis rate can be simply inter-converted using equation (3),  
 287 the observed trends are thus essentially the same.



**Table 2: Coefficients ( $\pm$  SD) of the relationship between half-life time  $t_{1/2}$  and pH** expressed as linear equation of the form  $\log(t_{1/2}) = b \times \text{pH} + D$ , valid for the pH range from 6.0 to 10.0.  $R^2$  expresses the goodness of fit of the linear regression.

| AHL    | $b$              | $D$            | $R^2$ | $t_{1/2}$ at pH 8.0<br>[min] | Source data                       |
|--------|------------------|----------------|-------|------------------------------|-----------------------------------|
| C6     | -0.67 $\pm$ 0.06 | 7.9 $\pm$ 0.4  | 0.980 | 347                          | Decho <i>et al.</i><br>(2009)*    |
| C8     | -0.62 $\pm$ 0.03 | 7.6 $\pm$ 0.2  | 0.994 | 437                          |                                   |
| C10    | -0.48 $\pm$ 0.04 | 6.6 $\pm$ 0.4  | 0.975 | 575                          |                                   |
| C12    | -0.5 $\pm$ 0.1   | 6.6 $\pm$ 0.9  | 0.822 | 398                          |                                   |
| C14    | -0.18 $\pm$ 0.08 | 4.7 $\pm$ 0.7  | 0.592 | 1820                         |                                   |
| C4     | -0.97 $\pm$ 0.02 | 10.5 $\pm$ 0.1 | 0.999 | 550                          | Ziegler <i>et al.</i><br>(2019)** |
| C6     | -0.97 $\pm$ 0.02 | 10.5 $\pm$ 0.2 | 0.999 | 550                          |                                   |
| C8     | -0.96 $\pm$ 0.07 | 10.4 $\pm$ 0.6 | 0.989 | 525                          |                                   |
| C6-oxo | -0.95 $\pm$ 0.02 | 10.1 $\pm$ 0.2 | 0.999 | 316                          |                                   |
| C8-oxo | -0.93 $\pm$ 0.02 | 10.0 $\pm$ 0.2 | 0.999 | 302                          |                                   |

\* in H<sub>2</sub>O at 26°C, \*\* in D<sub>2</sub>O at 22°C

288 The impact of temperature on the hydrolysis of C4, C6, C8 and C6-oxo has already  
 289 been established by Yates *et al.* [22]. Based on their data, the general tempera-  
 290 ture coefficients shown in Table 3 can be calculated, indicating that for every degree of  
 291 temperature increase, the hydrolysis rate  $k$  will increase by a factor of 1.03 to 1.08 and  
 292 half-lives will decrease accordingly. The impact of temperature decreases with increasing  
 293 acyl-chain length. The presence of an oxo-side chain reduces the impact of temperature  
 294 by approximately 0.01.

**Table 3: Temperature-dependent factors for hydrolysis rate  $k$  and half-life time  $t_{1/2}$**  for a +1°C temperature increase derived from data by Yates *et al.* (2003).

| AHL    | $Q_1$ for $k$ | $Q_1$ for $t_{1/2}$ |
|--------|---------------|---------------------|
| C4     | 1.08          | 0.93                |
| C6     | 1.07          | 0.93                |
| C8     | 1.03          | 0.97                |
| C6-oxo | 1.06          | 0.94                |

295 To obtain the most representative data basis for further analysis, we combined the  
 296 naturally relevant data obtained by Decho *et al.* [12] with the more chemically accurate,  
 297 time-resolved data by Ziegler *et al.* [28] for C6 and C8. For both of these AHLs, the  
 298 pH [12, 28] and temperature [22] influences on their abiotic decay have been established.  
 299 Comparability of both datasets was ensured by accounting for the kinetic isotope effect  
 300 of D<sub>2</sub>O compared to H<sub>2</sub>O and adjustment of the temperature by employing the coeffi-  
 301 cients from Table 3. Individual data points were then plotted and analysed as above,  
 302 yielding linear regression equations with a very good fit ( $R^2 > 0.95$ ) as shown in Fig. 3  
 303 (detailed fit parameters specified in Table S6).

304

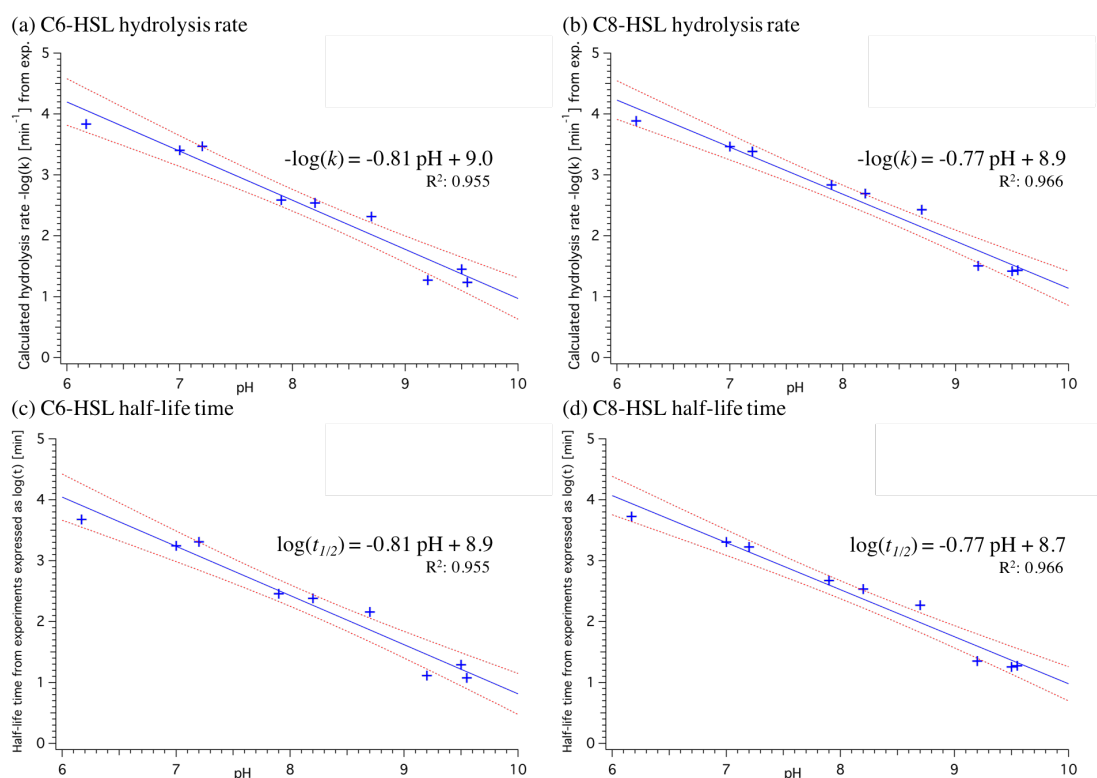

Figure 3: pH-dependence of hydrolysis rate  $k$  (top) and half-life time  $t_{1/2}$  (bottom) for C6- and C8-HSL with a pooled dataset including measurements from Decho *et al.* [12] and temperature adjusted data from Ziegler *et al.* [28] for which the kinetic isotope effect in  $D_2O$  was accounted for. Linear least-square fit (blue line) yielded the respective equation. Red dashed lines indicate 95% confidence bands on fit and  $R^2$  value indicates goodness of fit (the closer to 1 the better). Standard deviation of fit coefficients is specified in Table S6.

### 305 3.2 AHL hydrolysis in current and future average conditions

306 In current average ocean sea-surface pH and temperature conditions, the hydrolysis rate  
 307  $k$  of C6- and C8-HSL is considerably faster by  $0.70 \times 10^{-3}$  and  $0.75 \times 10^{-3}$  per minute  
 308 compared to future ocean conditions. This means that in average conditions predicted  
 309 by the IPCC under a RCP8.5 'business-as-usual' scenario for the year 2100, [1], the  
 310 hydrolysis rate for these two AHLs will be 38% and 45% slower compared to today, re-  
 311 spectively (Table 4). In turn, the half-life time of both AHLs will be increased in future  
 312 by 61% for C6-HSL and 82% for C8-HSL compared to today. This equals an increase in  
 313 half-life time by more than 4 or even more than 5 hours, respectively, compared to the  
 314 half-life time in current conditions.

315

**Table 4: Hydrolysis rate and half-life time of C6- and C8-HSL in average current and future conditions.**

| AHL | Current average conditions:<br>16°C, pH 8.1  |                    | Average conditions in the year 2100*:<br>20°C, pH 7.7 |                    | Difference due to climate change                    |                           | Relative change in future conditions compared to today |           |
|-----|----------------------------------------------|--------------------|-------------------------------------------------------|--------------------|-----------------------------------------------------|---------------------------|--------------------------------------------------------|-----------|
|     | $k$<br>[10 <sup>-3</sup> min <sup>-1</sup> ] | $t_{1/2}$<br>[min] | $k$<br>[10 <sup>-3</sup> min <sup>-1</sup> ]          | $t_{1/2}$<br>[min] | $\Delta k$<br>[10 <sup>-3</sup> min <sup>-1</sup> ] | $\Delta t_{1/2}$<br>[min] | $k$                                                    | $t_{1/2}$ |
| C6  | 1.85                                         | 428                | 1.15                                                  | 690                | -0.70                                               | 261                       | -38%                                                   | +61%      |
| C8  | 1.66                                         | 381                | 0.91                                                  | 694                | -0.75                                               | 314                       | -45%                                                   | +82%      |

\* based on IPCC RCP8.5 business-as-usual scenario

316 The difference in hydrolysis rate/ half-life time between current and future average  
 317 conditions also results in a noticeable difference in the decay of C6-HSL and C8-HSL  
 318 over the course of 10 hours, as shown in Fig. 4. Due to climate change, there will be  
 319 less abiotic hydrolysis of both AHLs. In average future conditions at pH 7.7 and 20°C,  
 320 there will be 17.2% more C6-HSL and 21.0% more C8-HSL after 10 hours compared  
 321 to current average ocean conditions. The concentration of C6 and C8-HSL reached in  
 322 current conditions after 10 hours is only reached after more than 16 or 18 hours in future  
 323 conditions, respectively, resulting in the chemical signals lasting for up to 8 hours longer.  
 324

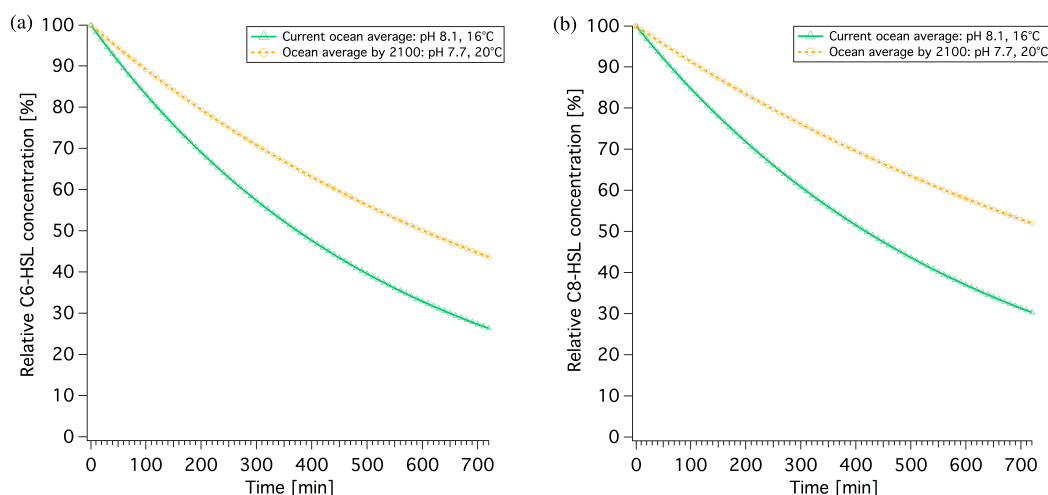

Figure 4: Current and future AHL concentrations over time for C6-HSL and C8-HSL. Decay is based on the respective hydrolysis rate stated in Table 4.

### 325 3.3 AHL hydrolysis dynamics in fluctuating conditions - quantification 326 of natural variability

327 While average changes are important to gain an impression of the overall impact of  
 328 ocean acidification and increased temperature, the natural variability within a system  
 329 at different levels of spatial and temporal resolution can be equally important in order

330 to obtain a holistic picture and understand baseline variability.

### 331 **3.3.1 Variability within the biofilm due to daily pH fluctuation**

332 Measurements by Decho *et al.* [12] in marine stromatolite mats in the Bahamas revealed  
333 substantial daily pH fluctuations of up to 2.6 pH units despite an external stable pH of  
334 around 8. Assuming that a relative shift of the external pH (-0.4 units) would equally  
335 translate to the pH fluctuations within the biofilm allows a prediction of the impact of  
336 future pH-conditions (Fig. 5). Temperature was kept constant in this instance.

337 Half-life time was greatest and hydrolysis rate slowest at 5:00 am in the morning,  
338 coinciding with the lowest pH value. Likewise, the lowest half-life time and fastest hy-  
339 drolysis rate were observed at 17:00 in the afternoon when the highest pH is reached  
340 (green data points in Fig. 5).

341 Over the course of the day in current conditions, the half-life time of C6-HSL was found  
342 to range from over 41 hours in the early morning to as little as 19 minutes in the af-  
343 ternoon. For C8-HSL,  $t_{1/2}$  similarly ranged between 48.5 hours and 29 minutes. The  
344 hydrolysis rate displays the inverse trend ranging from  $0.01 \text{ h}^{-1}$  in the early morning to  
345  $2.47 \text{ h}^{-1}$  in the afternoon for C6-HSL and a range from  $0.01 \text{ h}^{-1}$  to  $1.31 \text{ h}^{-1}$  for C8-HSL,  
346 respectively. Assuming a constant production (normalised to 1) and summing up pro-  
347 duced and remaining AHL amounts taking the different hydrolysis rates into account,  
348 fluctuating daily AHL concentration patterns become apparent. In current conditions,  
349 the C6-HSL concentration reaches the highest level with 10.3 times the produced amount  
350 at 9:00 in the morning and drops to the lowest amount at 17:00 in the afternoon. For  
351 C8-HSL a similar pattern with slightly shifted timings (lag) is observed with a maximum  
352 exceeding 11 times the produced amount at 10:00 am and a minimum at 6:00 pm. This  
353 means that the AHLs accumulate to amounts over a magnitude higher than what is  
354 produced over the course of the night and into the morning before they degrade back to  
355 amounts close to the baseline level. While accumulation happens over a timeframe of 16  
356 hours, degradation happens twice as quickly, within 8 hours.

357 In future conditions expected for the year 2100, half-life time and hydrolysis rate show  
358 the same patterns, coinciding with highest and lowest pH conditions as can be expected  
359 (Fig. 5, orange points). However, the linear shift of -0.4 pH units does not translate  
360 linearly, leading to more than double the half-life time at any given hour compared to  
361 the current conditions, and less than half the hydrolysis rate. This results in significantly  
362 higher levels of C6- and C8-HSL being present throughout under these future scenarios.  
363 C6-HSL accumulates for 16 hours to 12.6 times the amounts produced under current  
364 conditions, and is then degraded within 8 hours. Compared to current conditions, that's  
365 2.3 times the produced amount of C6-HSL at peak time in future conditions. Bacteria in  
366 future conditions could produce 18% less C6-HSL throughout the day to reach the same  
367 maximum concentration as in current conditions. For C8-HSL the differences for future  
368 compared to current conditions are even greater, with 14.4 times the produced amount  
369 at peak hour, 3.3 more than in current conditions. To achieve the same maximum peak  
370 concentration in future conditions, bacteria could produce 23% less C8-HSL throughout  
371 than in current conditions. Furthermore, the time at which maximum accumulation and

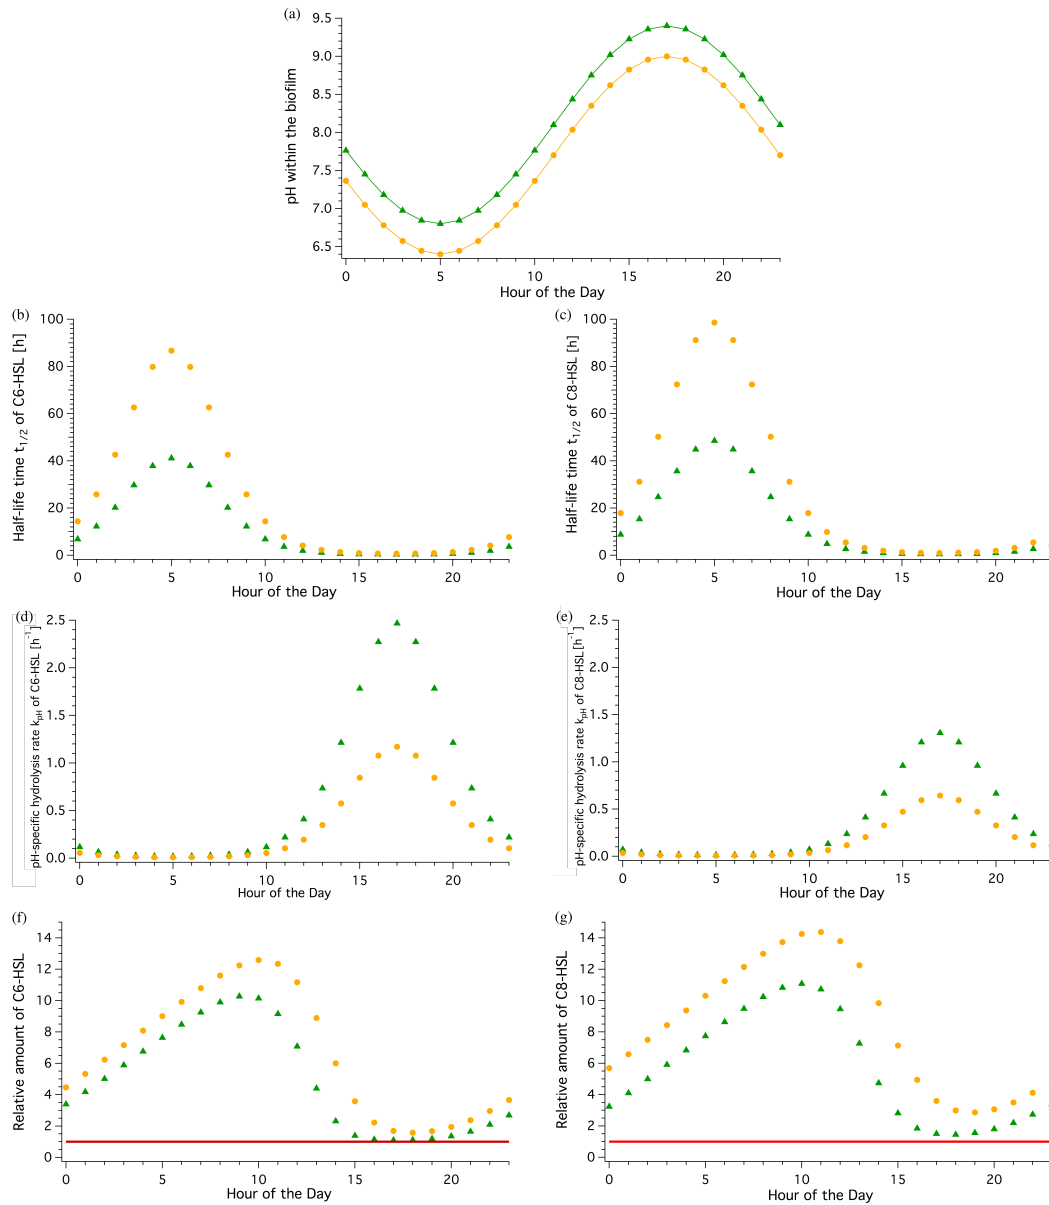

Figure 5: Current and future concentrations of C6-HSL and C8-HSL over a daily pH-cycle within a biofilm. (a) Periodically fluctuating pH-conditions based on Decho *et al.* [12] assuming stable temperature. (b) & (c) Half-life time in hours across a daily cycle for C6- and C8-HSL, respectively. (d) & (e) Hydrolysis rate  $k_{pH}$  over the course of the day for C6- and C8-HSL, respectively. (f) & (g) Relative amount of C6- and C8-HSL for every hour in a daily cycle. Amount produced is normalised to 1 (red line), so relative amount value reflects multitude of produced amount (accumulation).

372 lowest level of AHL is observed in future conditions is shifted by one hour for both AHLs.

373 The 16h accumulation and 8h degradation phases stay the same. Hence the reduction  
374 in pH due to ocean acidification can be expected to increase the baseline level of AHL  
375 concentration if the same level of production is maintained and shift the timing of the  
376 accumulation cycle.

377

### 378 **3.3.2 Seasonal variability based on the example of the Humber estuary** 379 **conditions**

380 Fluctuating conditions affecting habitats in coastal areas and estuaries, especially where  
381 there is significant tidal influence and/or fluvial input, were also found for the Humber  
382 estuary. The pH was found to vary between 7.2 and 8.4 without a clear seasonal pat-  
383 tern and mostly driven by tidal effects. Some very low pH values between pH 6 and  
384 7 were measured early and late in the year, correlated to heavy rainfall events. Tem-  
385 perature, in contrast, had a clear seasonal trend, as expected, and could be fitted with  
386 a sinus equation with an average temperature of  $10.99 (\pm 0.07)^\circ\text{C}$  and an amplitude of  
387  $6.5 (\pm 0.1)^\circ\text{C}$  (see Fig. 6 a & b). The pH and temperature adjusted half-life times and  
388 hydrolysis rates of C6-HSL calculated for each datapoint show the significant impact of  
389 the seasonal temperature pattern on these two parameters, but also reveal that there is  
390 a strong dependence on the pH causing large variability within a shorter than seasonal  
391 amount of time (days). Half-life time of C6-HSL throughout the year in the Humber  
392 estuary was found to be 23 hours on average, varying by  $\pm 13$  hours due to seasonal  
393 influences ( $\pm 57\%$ ). The hydrolysis rate was calculated to be on average  $0.05 \text{ h}^{-1}$ , vary-  
394 ing depending on season by  $\pm 0.024 \text{ h}^{-1}$  ( $\pm 48\%$ ). Especially during the summer month  
395 the combined pH and high temperature conditions seem to cause fairly high hydrolysis  
396 rates ( $> 0.1 \text{ h}^{-1}$ ) compared to the rest of the year (Fig. 6d). When averaged across all  
397 data points for each month, the half-life time and hydrolysis rate showed significant  
398 differences across the year. Half-life time of C6-HSL in autumn and winter (Oct to  
399 Mar) exceeded 20 hours and was significantly longer than in spring or summer (April  
400 to September)(Fig. 6e, green bars). This was inversely reflected in the hydrolysis rate  
401 showing highest rates from April to September ranging between  $0.05$  and  $0.08 \text{ h}^{-1}$  (Fig.  
402 6f, green bars). Shifting temperature by  $+4^\circ\text{C}$  and pH by  $-0.4$  units for every datapoint  
403 in line with IPCC predictions for conditions in 2100 results in significantly increased  
404 half-life times, which are on average 61% longer than those calculated for current con-  
405 ditions following the same seasonal pattern, and the hydrolysis rate in future conditions  
406 is on average 38% slower (Fig. 6e & f, orange bars).



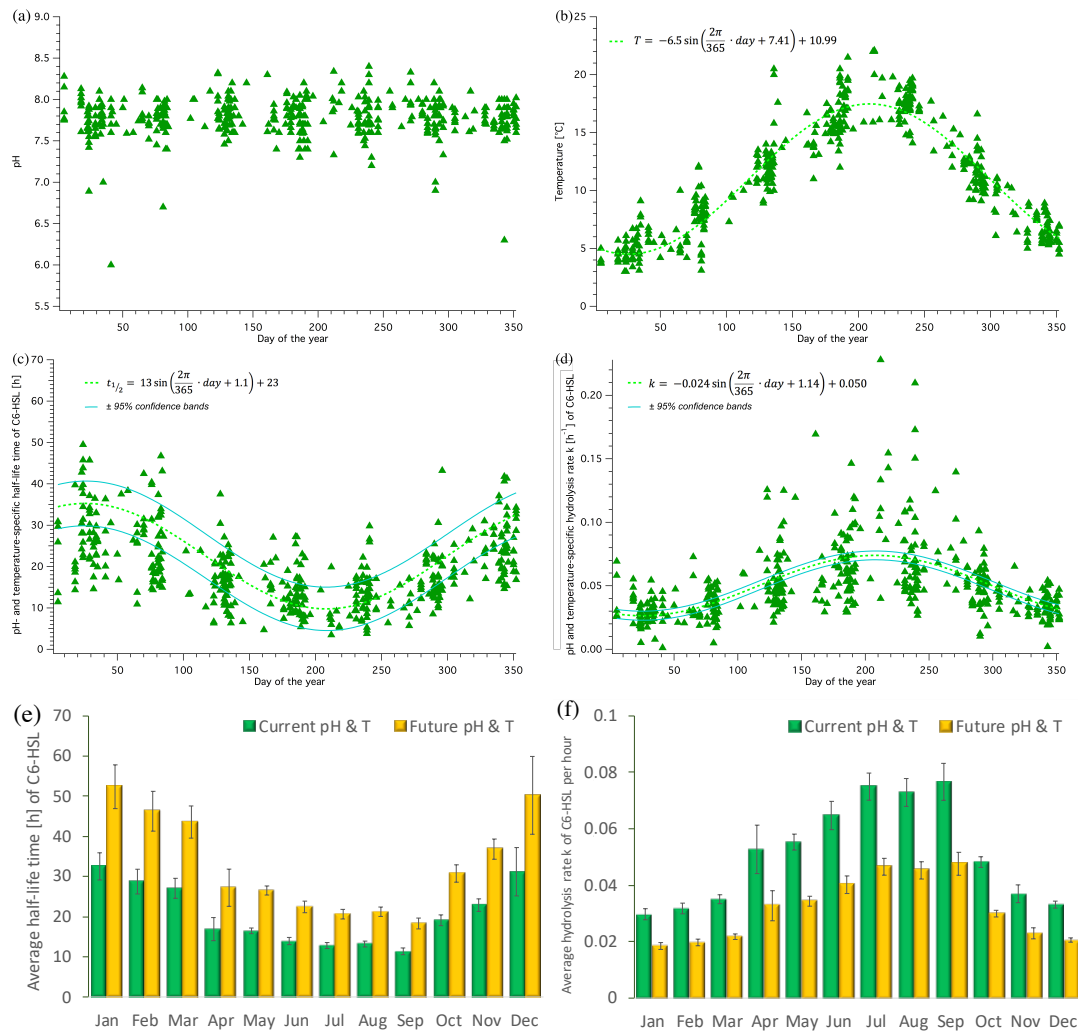

Figure 6: **Seasonal fluctuations of pH, temperature, C6-HSL half-life time and hydrolysis rate over the year.** (a) pH and (b) temperature measured within the Humber estuary (1995-2005) across the annual cycle. Trend of (c) half-life time and (d) hydrolysis rate of C6-HSL across the year assuming Humber conditions. Average ( $\pm$  SEM) monthly half-life time (e) and hydrolysis rate (f) for current (green) and future (yellow, based on average IPCC prediction of RCP8.5) Humber conditions.

### 407 3.3.3 Combined seasonal and daily fluctuations with a perspective on future 408 conditions

409 Seasonal differences in the water surrounding the biofilms with the AHL-producing bac-  
410 teria are also potentially reflected inside the biofilm. To assess and visualise the impact  
411 of external pH and temperature conditions on the daily fluctuations within the biofilm  
412 for each month (including average, maximum and minimum conditions), the respective

413 hydrolysis rates were calculated for C6-HSL based on equation (16) and the correspond-  
414 ing parameters determining  $k_{C6}$  from Fig. 3a as well as the respective temperature  
415 coefficient. Results are shown in Fig. 7. From January to April the impact of external  
416 factors was broadly comparable and highest pH and temperature conditions resulted  
417 in a hydrolysis rate of around  $1 \text{ h}^{-1}$  in the afternoon at peak pH within the biofilm.  
418 Minimum pH conditions at low and high temperatures resulted in very low hydrolysis  
419 rates. From May onwards the hydrolysis rates, especially in highest pH and temperature  
420 conditions, increase considerably, but there is also a larger variability of hydrolysis rates  
421 depending on the external conditions. Rates in November and December are lower again  
422 with less variability, similar to those in spring. It further becomes apparent that both,  
423 pH and temperature have a considerable impact on the hydrolysis rate within the biofilm.  
424

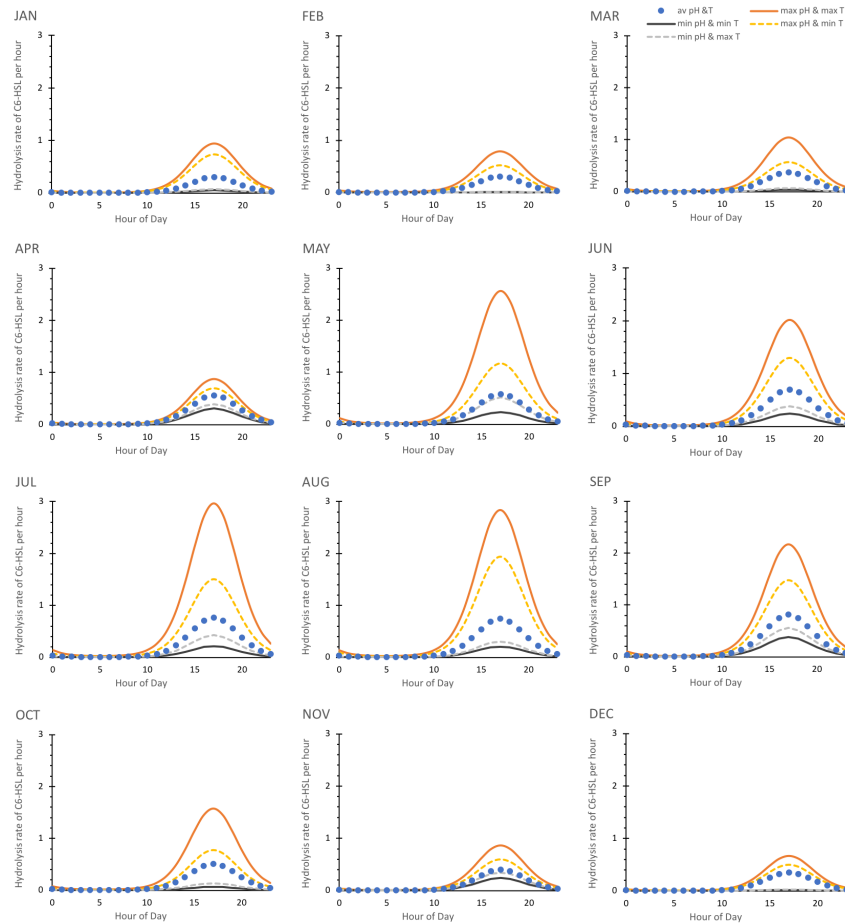

Figure 7: **Daily fluctuation of C6-HSL hydrolysis rate for average, minimum and maximum pH and temperature conditions each month.** Hydrolysis rate  $k$  is given in values per hour and calculated based on equation (16) and the seasonal average, maximum or minimum pH and temperature conditions of the Humber estuary dataset assuming that they translate unchanged to the biofilm as baseline conditions.

425 The seasonal effects on the daily dynamics of the C6-HSL hydrolysis rate within  
426 the biofilm will ultimately be reflected in the amount of C6-HSL that accumulates or  
427 degrades, as shown in Fig. 8. Relative levels of C6-HSL are highest in January and  
428 February, and lowest in July/August/September. During winter, C6-HSL amounts ac-  
429 cumulating within the biofilm can exceed 20 times the amount of what is produced. In  
430 contrast, during summer peak C6-HSL only reaches levels of about 14 times the pro-  
431 duced amount. This reflects a considerable seasonal variability of the AHL amount.  
432 In addition to the variability in the accumulating and degraded amount, there is a con-  
433 siderable shift in timing when the maximum or minimum C6-HSL level is reached. In  
434 January and February, peak C6-HSL levels are reached at noon and minimal levels oc-

435 cur at 8pm. From March to December the maximum levels are already reached an hour  
436 earlier (11am) and degrade to the minimum within 9 hours in the case of March and De-  
437 cember, or 8 hours to a minimum at 7pm in April to August, October and November. In  
438 September, the minimum level is reached already after 7 hours at 6pm. The differences  
439 in the timeframes of C6-HSL degradation highlights the considerable seasonal impact on  
440 the dynamics of this signalling system.

441 Placing this seasonal range in the context of future conditions by adjusting the relevant  
442 pH and temperature values relative to the IPCC RCP8.5 prediction (-0.4 pH, +4°C)  
443 yields a substantial shift of the C6-HSL amounts, which are found to accumulate at  
444 even higher levels, and up to 27 times the levels produced amount during winter and 16  
445 times the produced amount in summer, the latter being comparable to October levels  
446 under current conditions. Minimum levels are also raised compared to current condi-  
447 tions. Timings were found to be affected by seasonal differences, as observed for the  
448 current conditions.

449 These results highlight the substantial impact of climate change on the dynamics of  
450 AHLs like C6-HSL which far exceed naturally occurring variation found in current con-  
451 ditions.

452

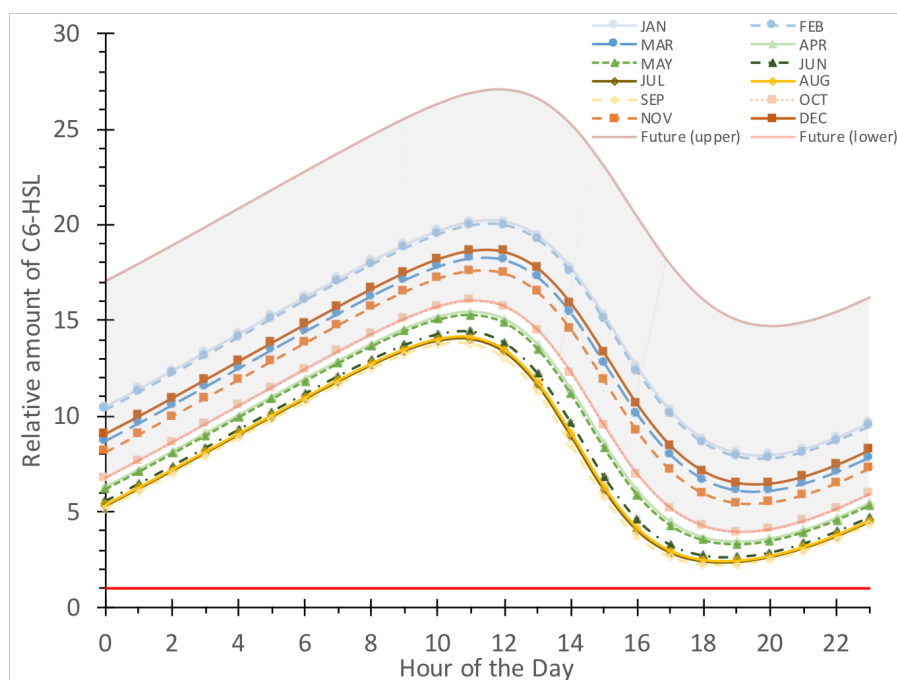

Figure 8: **Comparison of daily fluctuating relative C6-HSL concentration for average pH and temperature conditions each month.** Relative amount is calculated based on a normalised production of 1 (red line) and current conditions within the Humber estuary for every month (averaged). The projected future range of the fluctuation is shown in grey with the upper and lower boundaries representing January (upper) and September (lower) C6-HSL amounts calculated for conditions shifted by the IPCC RCP8.5 prediction (-0.4 pH, +4°C).

## 453 4 DISCUSSION

454 The key purpose of this study was to investigate theoretically how the degradation of  
455 AHLs is affected by abiotic environmental changes. We established a numerical relation-  
456 ship between pH and AHL hydrolysis rate/ half-life time and calculated temperature  
457 coefficients for all relevant conditions based on collated published data. By comparing  
458 the impact of pH and temperature on AHL concentration individually and combined at  
459 different timescales, this study reveals that natural daily and seasonal, as well as pro-  
460 jected climate change associated abiotic changes, all have the potential to considerably  
461 influence the dynamics of AHLs in biofilms and thus impact biofilm form and function.

### 462 **The daily rhythm of AHL dynamics driven by pH and the importance of** 463 **other influencing factors**

464 Within a daily timeframe, a cycle of accumulation and degradation of AHLs occurs  
465 in a rhythmic pattern arising from the impact of the natural pH fluctuations inside the  
466 biofilm, based on the hydrolysis rate. Higher pH in the afternoon, thought to be caused  
467 by the photosynthetic activity of biofilm-associated phototrophic organisms, [12] leads to  
468 a sharp increase in the hydrolysis rate and in turn to an up to 3 times faster degradation  
469 of the AHL molecules (Fig. 5 d&e, Fig. 7). This pH-driven dynamics can be enhanced or  
470 reduced to a small extent by temperature (Fig. 7). Declining pH during hours with little  
471 or no light, and hence little photosynthetic activity within the biofilm, slows down the  
472 hydrolysis rates and results in much longer half-live times of the AHL molecules during  
473 the early hours prior to sunrise (Fig. 5 b&c). AHL concentrations reach their peak in  
474 the late morning and their lowest level in the late afternoon (Fig. 5 f&g, Fig. 8). This  
475 dynamic does not directly mirror the timing of lowest and highest pH, but the highly  
476 increased hydrolysis rate at peak pH diminishes the available AHLs very quickly so that  
477 the lowest AHL concentrations occur shortly after the pH maximum.

478 To validate our theoretical results, we compared the difference in concentration of C8-  
479 AHL between 6am and 5pm, the times when actual measurements were taken by Decho  
480 and co-workers [12]. They analytically determined the C8-AHL concentration in the  
481 morning to be  $6.5 \pm 0.8$  ppb, 1.8 times ( $\pm 0.5$ ) higher than in the afternoon ( $3.6 \pm 0.9$   
482 ppb) [12]. Our calculations yield a 5.3-times higher concentration in the morning than in  
483 the evening for the same times, exceeding the experimental results approximately 2-fold.  
484 There are a number of potential reasons for this theoretical overestimation of the AHL  
485 difference in our approach: inconsistent AHL production, deviations of the dynamics-  
486 determining parameters, and additional AHL degradation through other mechanisms.  
487 Firstly, for our calculation we assumed a consistent level of AHL production throughout  
488 the day. It is, however, likely that AHL production and excretion by bacteria occur  
489 inconsistently and locally [26] as it forms part of their cell-cell communication. This  
490 may vary across a daily cycle and is known to potentially depend on other internal and  
491 external factors, such as cell density and distribution, composition and physical char-  
492 acteristics of the surrounding medium, available carbon sources and oxygen limitation  
493 amongst many others [33]. Infrequent production would cause a reduced amount of accu-

494 mulating AHLs and therefore a smaller difference. Secondly, less pronounced dynamics  
495 of AHLs in nature could also be caused through deviations from the parameters used in  
496 our calculations, particularly the hydrolysis rate. An underestimation of the naturally  
497 occurring hydrolysis rate could have caused the greater amounts of AHLs accumulating  
498 in our calculations. The hydrolysis rate we employ is based on an averaged value derived  
499 from abiotic laboratory experiments published by Decho *et al.* [12] and Ziegler *et al.* [28].  
500 This rate does not take into account any naturally occurring temperature fluctuations,  
501 which might have influenced the natural hydrolysis and hence analytically measured  
502 AHL concentrations. Unlike for pH, temperature fluctuations were not quantified and  
503 reported across the daily timeframe for the experimental data, limiting our possibility  
504 to take them into account in this calculation used for comparison. The laboratory ex-  
505 periments underlying the hydrolysis rate were further conducted with different chemical  
506 methods (extraction + GC/MS vs. NMR), which is why we combined and averaged  
507 the respective results for a more representative rate. It might be that the slightly faster  
508 rates determined using GC/MS [12] are closer to those in the field compared to the rates  
509 obtained through NMR measurements in D<sub>2</sub>O and subsequent conversion [28] (see Table  
510 1 for comparison). It is, however, interesting to note that other experiments aiming to  
511 identify degradation rates of AHLs in seawater found significantly lower rates [19, 23].  
512 Tait & Havenhand determined the degradation of C6-HSL and C8-HSL in seawater at  
513 18°C to be 1.5 ( $\pm 0.2$ )% /hour and 1.0 ( $\pm 0.5$ )% /hour, respectively. [19] These rates are  
514 by a factor of 6 to 7 slower than those reported by Decho and coworkers for pH 8.2, but  
515 similar to those reported by Hmelo & van Mooy (pH 7.9), who suggest that AHL degra-  
516 dation in seawater might be slower than in non-marine media [23]. An underestimation  
517 of the hydrolysis rate in our approach is therefore unlikely to explain the discrepancies  
518 between our calculated difference and the naturally observed difference. Thirdly, the  
519 detectable amount of AHL and its accumulation could be affected by other diminish-  
520 ing factors such as leaking of AHL from the biofilm, enzymatic AHL degradation or  
521 metabolism by other organisms [10]. This additional loss could account for the 66%  
522 smaller AHL difference observed in nature compared to our calculated result. While  
523 leaking can be expected to be comparably low due to the protective EPS matrix of nat-  
524 ural biofilms [33], it does occur to some extent [17] as evidenced by several AHL-induced  
525 interactions with settling macro-organisms [10, 19] (for overview). These interactions  
526 require sensing of AHLs by the macro-organism in the water column from a distance to  
527 the biofilm. Also, AHLs with shorter chain lengths (e.g. C4, C6) are less hydrophobic  
528 and consequently diffuse more rapidly into the surrounding than longer-chain AHLs. [17,  
529 33] Besides leakage, biotic degradation of AHLs through enzymes is a factor that could  
530 explain a substantial part of the difference between our calculations and the AHL levels  
531 as it is known to play a key role in bacterial biofilms. [33] Hmelo & van Mooy found 54%  
532 of C6-HSL degradation in seawater to be likely caused by enzymatic activity [23]. Be-  
533 cause AHLs serve as fundamental cell-cell communication in many bacteria, disruption  
534 of this communication pathway by quenching AHLs enzymatically provides competitive  
535 benefits for other bacteria and is in fact widespread [33, 34]. Two major types of AHL  
536 quenching enzymes have been described, lactonases and acylases, [35] which hydrolyse



537 the lactone ring [36, 37] or cleave the amide bond of the AHL 'tail' [38], respectively.  
538 While these enzymes work across a wide range of environmental conditions, [39] some  
539 were found to follow a steep pH-dependent optimum curve [40], potentially adding to  
540 the complexity of the pH-dependent daily dynamics of AHLs.  
541 Despite the likely influence of other AHL degrading factors in nature as shown by the  
542 direct comparison, our investigation reveals that abiotic AHL degradation through hy-  
543 drolysis linked to a daily cyclic pH pattern plays an important role, yielding results in  
544 the same order of magnitude as comparable experimental measurements. Our results  
545 overestimate the difference by a factor that matches the 50 to 60% AHL observed to  
546 be lost through enzymatic degradation [23]. In turn, this means that abiotic hydrolysis  
547 accounts for at least 1/3 or more of the observable dynamics. For subsequent interpre-  
548 tation of our results, the importance of other influencing factors, however, has always  
549 to be taken into consideration. It also has to be noted that there is an apparent lack of  
550 biofilm parameters and abiotic conditions that are monitored continuously or regularly  
551 for a daily timeframe and local context, e.g. near sediment or rocky colonised surfaces.  
552 We therefore suggest a focus of future measurements on the daily patterns of natural pH  
553 and temperature in direct relation to AHL concentrations with hourly intervals within  
554 the natural habitat of interest, for example surface biofilms on sediment or rocky sub-  
555 strate.

556

557 **Seasonal impacts on AHL dynamics driven by temperature** AHL hydrolysis  
558 rate and half-life time showed a clear seasonal pattern across the year with results in  
559 hydrolysis rate varying by 48% and half-life time by 57% largely due to the temperature  
560 influence. Significantly higher hydrolysis rates in spring and summer, and, in contrast,  
561 half-life time exceeding 20 hours in autumn and winter, clearly mimic the temperature  
562 pattern. The change in hydrolysis rate between winter and summer exceeds a factor  
563 of 2, suggesting that seasonal conditions impact AHL dynamics in a way that is likely  
564 reflected in the overall dynamics, despite other influences. Combining seasonal and daily  
565 fluctuations in pH and temperature revealed that seasonal differences are reflected in the  
566 daily patterns and subsequently cause a shift in the daily cycle. In summer, AHL levels  
567 accumulate to only 70% of winter levels, taking an hour longer to do so and becoming  
568 degraded within only 7 hours, so one hour quicker than in winter. In addition, maximum  
569 AHL concentration in summer is reached two hours earlier in the day than in winter,  
570 shifting the timing of the cycle.

571 Our calculations for combined seasonal and daily dynamics assume a direct translation  
572 and addition of external conditions to the internal conditions within the biofilm. This  
573 means that external temperature was assumed to represent biofilm temperature and the  
574 external pH at any given date was used as the midline point for the biofilm-internal  
575 pH curve modelled with an amplitude of 1.3 across the day based on Decho *et al.* [12].  
576 External pH and temperature changes might, however, be compensated by the biofilm-  
577 surrounding chemical matrix of EPS, which is assumed to buffer pH fluctuations [31] and  
578 extreme temperatures [41]. To what extent biofilms are able to actually compensate ex-

579 ternal abiotic conditions, however, is currently poorly understood and requires dedicated  
580 experiments, which simultaneously and systematically measure external and internal pH  
581 and temperature gradients in situ. Due to the afore mentioned other influencing fac-  
582 tors, small seasonal differences indicated in our calculations need to be interpreted with  
583 caution. In a recent field study assessing the concentration of C8, C10 and C12-HSL in  
584 surface sediment of an intertidal mudflat, Stock *et al.* found AHL concentrations in sam-  
585 ples from February and April to not differ significantly. [14] This contrasts the small but  
586 significant theoretical increase in average hydrolysis rate we obtained for April compared  
587 to February based on the data for the Humber estuary assuming similar seasonal patterns  
588 of both estuaries. Similar AHL levels for February and April further fits with the very  
589 similar daily hydrolysis rate profiles we obtained. To actually assess season-dependent  
590 AHL dynamics, further sampling over the summer, autumn and winter months would be  
591 required. The substantial differences between summer and winter we obtained, however,  
592 do suggest the potential for significant dynamics differences between these two seasons.

### 593 **pH and temperature as combined factors - enhancing or compensating effects**

594 **depend on the timeframe** While pH changes dominate AHL dynamics within a daily  
595 timeframe, we observed temperature to particularly influence AHL degradation patterns  
596 in a seasonal context. Depending of the combination of these two factors, however, the  
597 hydrolysis rate can be sped up or slowed down. An increase in temperature increases the  
598 hydrolysis rate [22]. Higher pH also leads to a higher hydrolysis rate [12, 28]. Highest  
599 hydrolysis rates and consequently fastest degradation of AHLs can therefore be expected  
600 in the late afternoon and early evening during the summer months. In contrast, lowest  
601 hydrolysis rates and almost no degradation can be assumed for night and early hours  
602 in winter. These patterns can be observed as expected from our calculations of daily  
603 hydrolysis rates for each month (Fig. 7). The combined effect of temperature and pH is  
604 therefore clearly time-dependent on a daily and seasonal scale due to the corresponding  
605 natural fluctuations.

606 Climate change is predicted to result in higher temperatures and lower pH conditions  
607 [1]. The temperature-associated increase in hydrolysis rate is opposed by a pH-related  
608 reduction, which might result in effects cancelling each other out. However, our results  
609 reveal that the effect of pH exceeds the effect of temperature, resulting in a clear reduc-  
610 tion in AHL hydrolysis and hence increased AHL concentrations for any of the future  
611 scenarios calculated.

### 612 **Climate change impacts - small average changes in the context of large natu-**

613 **ral abiotic fluctuations do matter for AHL dynamics** Looking at the impact of  
614 predicted average climate change related reduction in ocean pH and increase in sea sur-  
615 face temperature revealed an overall decrease in the hydrolysis rate of C6- and C8-AHLs  
616 in future oceans. This results in higher levels of the AHLs being present for longer in  
617 the environment (Fig. 4). Combining daily, seasonal and future parameters also clearly  
618 indicates the impact on AHL dynamics across these different timescales (Fig. 8). Future  
619 average changes in temperature and pH might seem small compared to the natural range

620 of these parameters (+4°C compared to a natural seasonal temperature range of 13°C  
621 (31%), -0.4 pH compared to a daily pH range of 2.6 (15%)). But, while reflecting the  
622 daily and seasonal patterns, the future scenario results in even higher levels of C6-HSL,  
623 reaching more than 1.4 times the levels present under current conditions, and causes  
624 levels to never fall below current October levels by exceeding current winter levels by  
625 more than 30%.

626 The buffering of external conditions by the biofilm discussed previously and potential  
627 limitations due to our assumption of a direct translation of external factors to biofilm-  
628 internal conditions also apply in the context of future conditions. We further applied the  
629 projected average future changes in pH and temperature directly to the current natural  
630 ranges, resulting in a shifted range. An increasing number of studies, however, indi-  
631 cates that pH conditions are not only expected to shift but also considerably increase in  
632 variability [42], emphasising pH extremes. In addition, marine heatwaves are predicted  
633 to become more frequent and last longer. [1] Our results might therefore simplify and  
634 potentially underestimate the influence of future ocean conditions.

635

636 **Applicability of results to other AHLs** We focussed in this study on C6 and  
637 C8-HSL due to their documented presence and functions in marine biofilms [8, 12, 14]  
638 and the availability of sufficient data to determine pH and temperature impacts numer-  
639 ically. It is, however, important to note that the hydrolysis rate and the extent of pH  
640 and temperature influence depend on the chain-length of the AHL, [12, 22, 28] which  
641 is also reflected in our results (Tables 1 and 2). Shorter chain AHLs, namely C4 and  
642 C6-HSL, degrade faster with higher hydrolysis rates than AHLs with side chains of 8 or  
643 more carbons. [12, 22, 33] AHLs with a 3-oxo substitution, in contrast, degrade faster  
644 than their unsubstituted counterparts [22, 23] due to an additional abiotic degradation  
645 pathway via a Claisen-like condensation to tetramic acids [43]. For long-chain AHLs  
646 with longer half-life times, it can therefore be assumed that abiotic hydrolysis plays a  
647 minor role in signal termination and that most of these signals are degraded through  
648 enzymes to ensure termination of the signal within a relevant timeframe. The impact of  
649 fluctuating conditions and the resulting daily and seasonal dynamics shown here for C6  
650 and C8-HSL may therefore not be as pronounced for longer-chain AHLs. But impacts of  
651 pH and temperature might be indirectly reflected in AHL concentrations as they might  
652 influence the kinetics of degrading enzymes. [40] AHL-quenching enzymes AiiA & Est  
653 isolated from a *Altererythrobacter sp.* strain from a marine beach (Red Sea) were found  
654 to actively cleave 3-oxo-C12-HSL in pH conditions between pH 5-10 or pH7 to >10,  
655 respectively. [40] However, optimum quenching activity was reached at pH 8 or 9 with  
656 significant reductions in activity for pH < 8. [40] A reduction by on average 0.4 pH units  
657 with ocean acidification could result in approx. 25% reduction in enzyme activity based  
658 on extrapolation of the data by Wang *et al.* [40]. This adds another layer of complexity  
659 by potentially enhancing the observed higher AHL concentrations in future conditions  
660 due to reduced quenching. Interestingly, our results also reveal that the extent of the  
661 impact of future conditions on abiotic hydrolysis rate and half-life time and consequently

662 on the AHL concentration increases with increasing chain length. This is likely caused  
663 by the reduced compensating impact of the temperature influence on the hydrolysis rate  
664 (less acceleration) in relation to the impact of pH (reduces  $k$ ), as longer AHLs are also  
665 less sensitive to elevated temperatures. [22, 33]. This results in a greater increase in  
666 concentration of AHLs with longer chains compared to shorter chain ones subjected to  
667 the same pH change. To more conclusively understand and estimate the impact of future  
668 conditions as well as natural fluctuations on AHL dynamics across the range of chain  
669 lengths and un-/substituted molecules, measurements of abiotic and biotic degradation  
670 under set environmental parameters need to be conducted.

671

### 672 **Biological and wider implications of AHL dynamics in current and future**

673 **oceans** In the context of the substantial current fluctuations in AHL concentrations  
674 on daily and seasonal timescales, the impact of future ocean conditions shown in our  
675 results poses the question how an overall increase in concentrations and a change in  
676 timing of the AHL peak may affect marine, coastal and estuarine biofilms and their  
677 functioning.

678 For bacteria-bacteria interactions, the AHL communication system is finely tuned with  
679 AHL threshold concentrations for bacterial growth and adhesion ranging from 10 ng/L  
680 to 10  $\mu$ g/L (0.5-0.3 pM to nM) depending on biofilm composition and bacteria [44].  
681 If higher AHL concentrations will prevail for longer in future conditions, as suggested  
682 by our results, bacteria would benefit, because less of the respective AHL needs to be  
683 produced to achieve the same threshold within the same timeframe. Likewise, if pro-  
684 duction remains unchanged, threshold concentrations would be reached faster or with  
685 a lower cell density, and the signal would be able to travel for a longer distance from  
686 the source, [23] making AHL-signalling more efficient. These potential impacts of fu-  
687 ture conditions were also hypothesised by Hmelo. [25] The enhanced longevity of AHL  
688 signals might boost biofilm formation, biofilm growth through enhanced bacterial cell  
689 growth and replication, and bacterial EPS and enzyme production [8, 25]. The range  
690 of the daily dynamics of C6 and C8-AHL in our study exceeds a factor of 10, which  
691 is even further enhanced in future conditions. Assuming that bacteria operate close to  
692 their concentration thresholds to maintain meaningful signalling, the daily cycle could  
693 lead to times during which AHL-signalling is facilitated (night and early morning) or  
694 prevented (afternoon) due to the conditions within the biofilm caused by the autotrophic  
695 co-habiting organisms. A similar conclusion on the possibility of AHL being involved  
696 in the timing of interactions was also reached by Hmelo [25] and Decho *et al.* [12, 45]  
697 with the latter establishing natural concentration differences across the daily cycle close  
698 to threshold concentrations in a range of 13 pmol/ g dry sediment for C8-HSL and 3.8  
699 nmol/ g dry sediment for C10-HSL [12]. However, the shift to the cycle's timing by an  
700 hour due to future conditions, as identified in our study, would likely have very limited  
701 impact, given that the current natural seasonal changes affect peak AHL times by up to  
702 two hours as discussed above.

703 Apart from enhancing the bacteria-bacteria interactions, higher and more stable AHL

704 concentrations would also impact other interactions of importance in a biofilm con-  
705 text. Greater signalling power of C10-AHL, for example, could boost the formation  
706 of diatom-biofilms, as it has been shown to promote chlorophyll a concentrations and  
707 diatom-derived EPS production [16]. But threshold concentrations required to trigger  
708 increased carbohydrate levels in diatom biofilms (0.1 mg/L; 0.4  $\mu$ M) or enhanced diatom  
709 growth (1 mg/L; 4  $\mu$ M) are an order of magnitude higher than concentrations triggering  
710 bacteria-bacteria interactions. [16, 44] With our results suggesting a maximum increase  
711 of AHL concentration by approx. 20%, it is likely that these changes due to future  
712 ocean conditions alone will not impact these interactions substantially. However, they  
713 might enhance AHL accumulation at key times within the daily and seasonal cycles and  
714 thereby act synergistically to considerably strengthen and/ or prolong the signal. The  
715 same applies for interactions with macro-organisms. Concentrations of around 5  $\mu$ M  
716 necessary to induce the settlement of cypris larvae of *Balanus improvisus* [19] and more  
717 than 100  $\mu$ M to trigger exploratory behaviour of the polychaete *H. elegans* [20] might be  
718 exceeded earlier, at a lower bacteria density or reach further into the water column and  
719 hence trigger more settlement of macro-organisms due to signal enhancement through  
720 future conditions.

721 Future prolongation of signal life-span might, however, also pose issues: the short chain  
722 AHLs used as a form of short-messaging system in bacterial biofilms [25, 33] would not  
723 degrade as readily under future conditions and hence become less suitable for instant  
724 messaging. This might also affect the ratio of short- and long-chain AHLs in mixtures,  
725 which is hypothesised to play a role in complex settlement interactions with zoospores.  
726 [13] Due to their important role in the establishment of biofouling communities, higher  
727 AHL concentrations sustained for longer might also make biofouling of surfaces more  
728 common. [8, 25]

729 Signalling via AHLs is involved in fundamental biogeochemical and ecological processes  
730 in marine ecosystems, such as the remineralisation, dissolution or disaggregation of sink-  
731 ing particulate organic carbon, nutrient cycling, initial colonisation of surfaces and settle-  
732 ment of marine organisms (see Hmelo [25] for an overview). Changes to these processes  
733 would be of global significance. And we hypothesise that there is another fundamen-  
734 tal ecosystem service likely to be affected by changes to AHL dynamics: biologically-  
735 mediated sediment stabilisation. Marine biofilms, in particular the EPS they produce,  
736 and the presence of vegetation and/or bioturbating organisms have been established as  
737 key factors in sediment stabilisation within coastal and especially tidal marine ecosys-  
738 tems and estuaries, such as saltmarsh and mudflat habitats. [46] AHLs are known to be  
739 of great importance in mediating biofilm communities, for example by inducing growth  
740 of diatoms [16] or boosting EPS production [47], and mediate the interactions with asso-  
741 ciated organisms like macroalgae [17] and bioturbating worms [20]. We therefore suggest  
742 that AHLs could be crucial mediators and quantitative changes to AHL concentrations  
743 can affect the sediment stability and thus highlight the need for more work to fully ex-  
744 plore these important impacts.

745

## 746 **5 Conclusion**

747 Our study reveals that pH- and temperature-dependent abiotic hydrolysis of the key  
748 bacterial chemical signal class of AHLs leads to substantial theoretical dynamics of  
749 these important chemical signals in biofilms across daily and seasonal timescales. The  
750 work additionally highlights how these variations are amplified by a switch to projected  
751 future conditions caused by climate change. Our results indicate the importance of these  
752 abiotic drivers in the context of current natural fluctuations and other biotic influences  
753 on the AHL dynamics, showing that future ocean conditions likely result in higher AHL  
754 concentrations being present for longer, but within similar daily and seasonal cycles. The  
755 chemical dynamics of AHLs on different timescales could lead to changes in the timing  
756 of AHL-mediated processes and associated behaviours like the settlement of micro- and  
757 macro-fouling organisms. Future changes might not only enhance settlement, but also  
758 increase sediment stability by impacting estuarine biofilms. However, more detailed  
759 studies on the buffering capacity of biofilms with regards to external conditions on daily  
760 and seasonal timescales need to be conducted. The natural dynamics and importance  
761 of enzymatic degradation in relation to abiotic hydrolytic degradation in intertidal and  
762 estuarine biofilms need to be established for the full range of relevant AHLs with different  
763 chain lengths that are present in those biofilms. Direct links between AHLs and sediment  
764 stability due to cohesion through biofilms remain to be established.

## 765 **6 Acknowledgements**

766 This work was funded by ERC-2016-COG GEOSTICK (Project ID: 725955) and CCR  
767 acknowledges funding through a University of Hull Vice-Chancellor Research Fellowship.



## 768 7 SUPPLEMENTARY

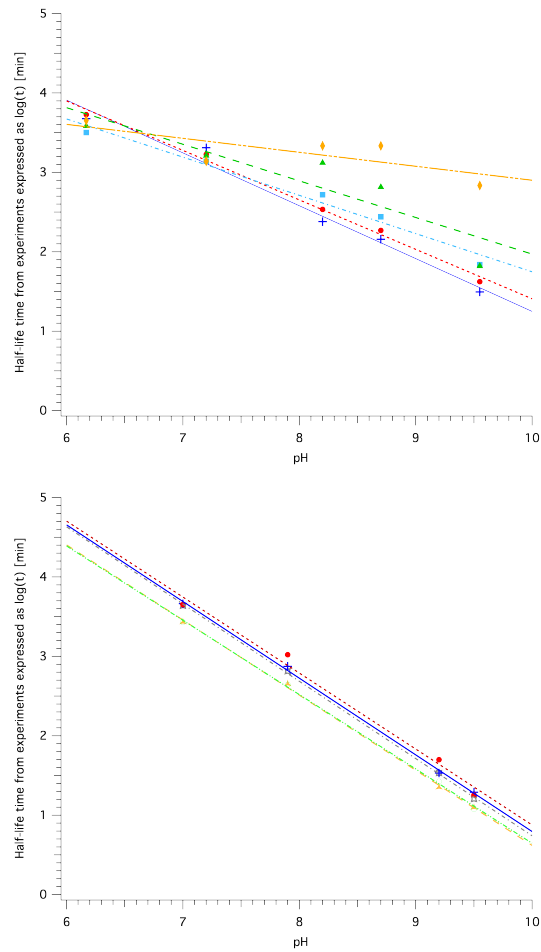

769 **Figure S1: pH-dependence of half-life time  $t_{1/2}$  for different AHLs.** Based  
770 on data published by Decho *et al.* [12] (left) for C6 (blue, cross), C8 (red, circles), C10  
771 (light blue, squares), C12 (green, triangles) and C14 (orange, diamonds) and data pub-  
772 lished by Ziegler *et al.* [28] (right) for C4 (grey, star), C6 (blue, cross), C8 (red, circles),  
773 C6-oxo (orange, triangle) and C8-oxo (light green, open circles). Coefficients for linear  
774 least-square fit following the equation  $\log(t) = b \times pH + D$  are detailed in Table 2.

775

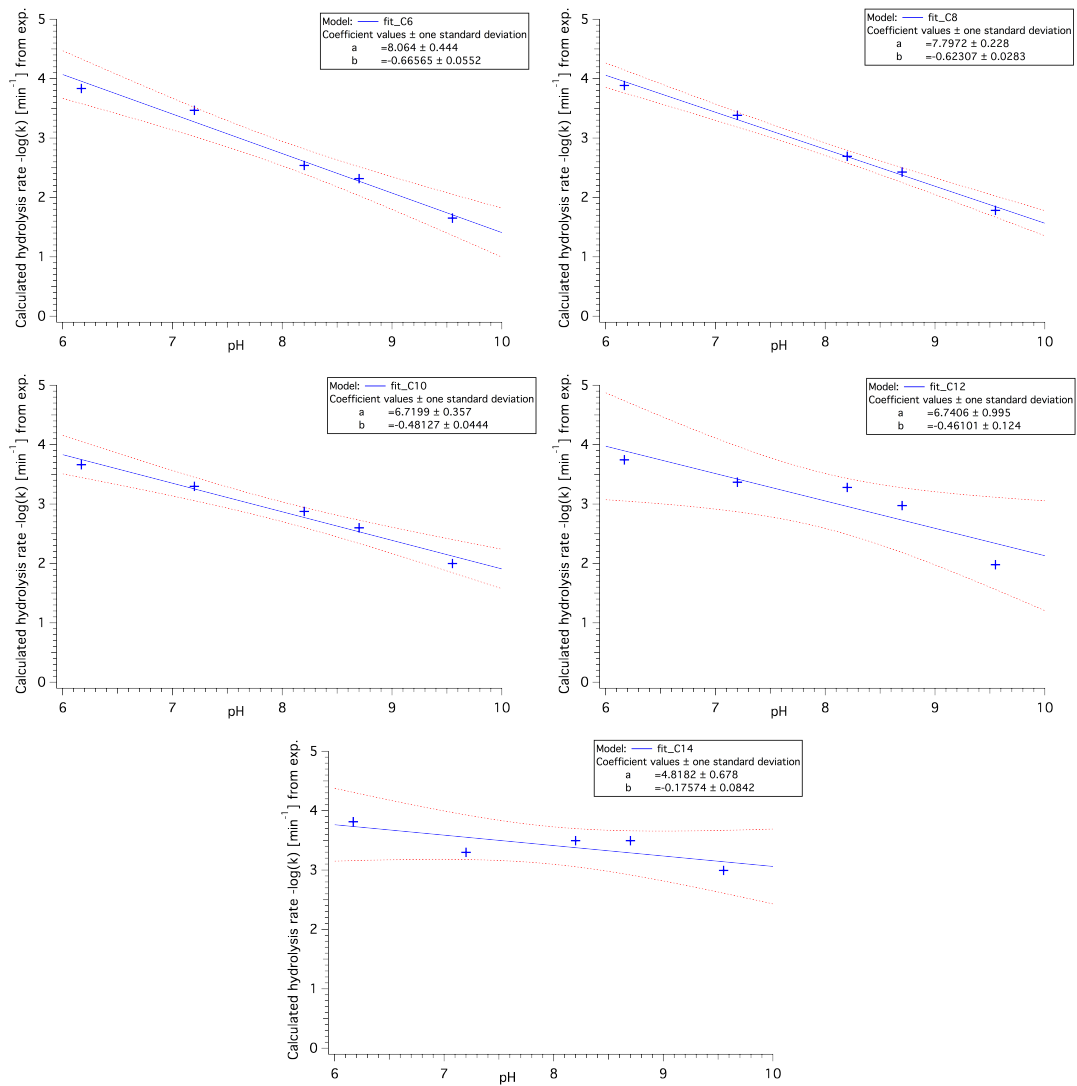

776 **Figure S2: Hydrolysis rate  $k_{pH} - pH$  - based on experimental values at**  
777 **26°C by Decho.**

778

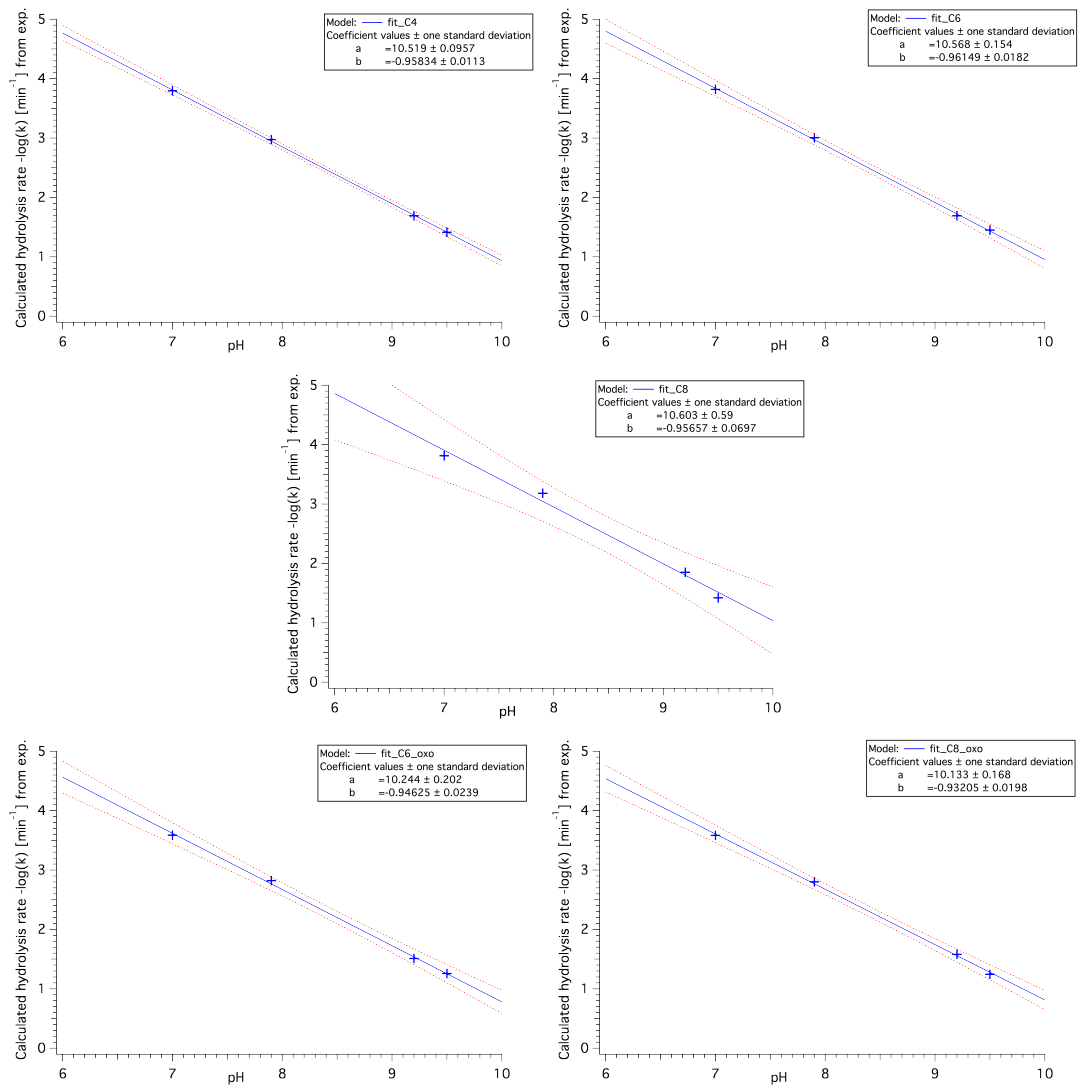

779 **Figure S3: Hydrolysis rate  $k_{pH} - pH$  - based on experimental values at**  
780 **22°C by Ziegler.**

781

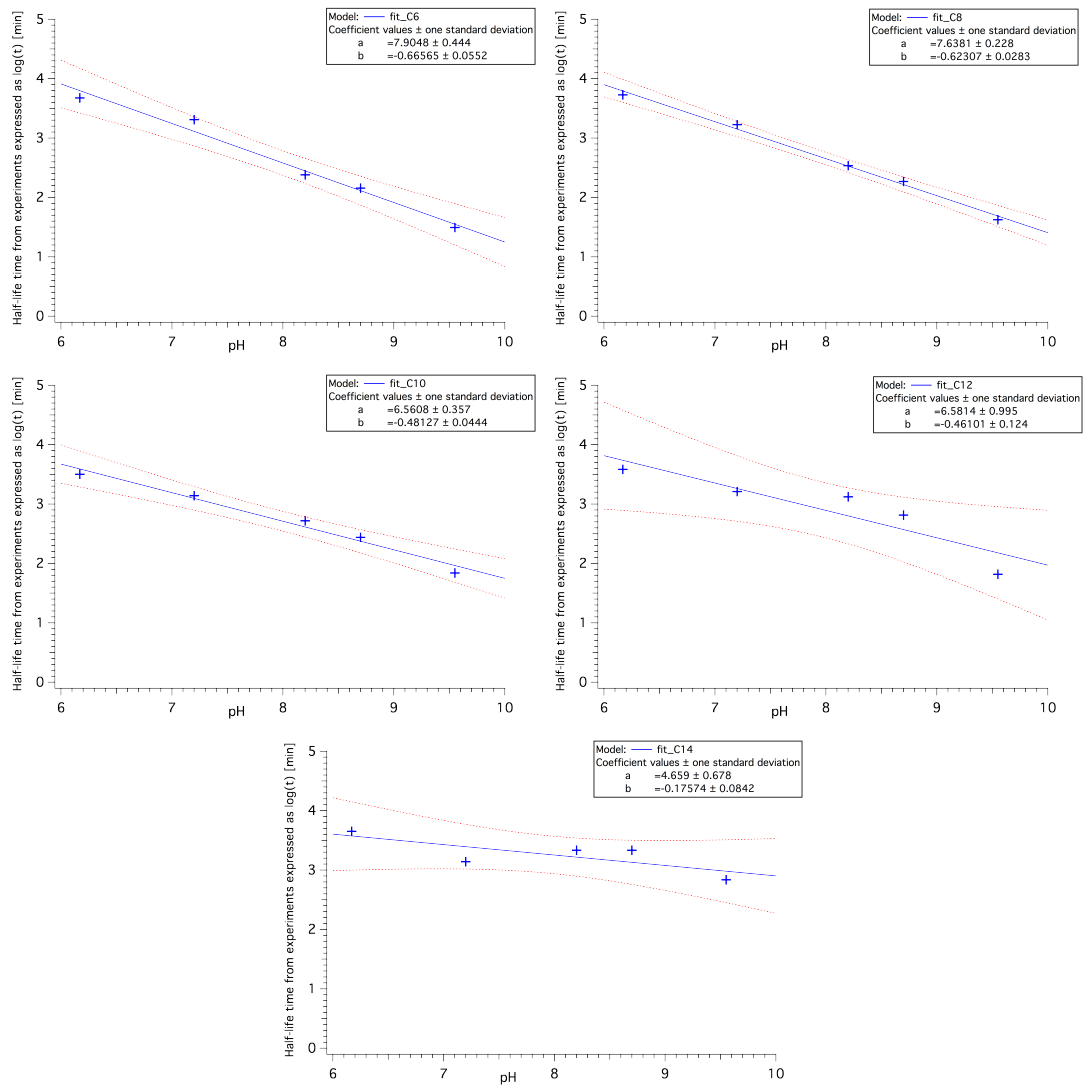

782 **Figure S4: Half-life time – pH - based on experimental values at 26°C by**  
783 **Decho.**

784

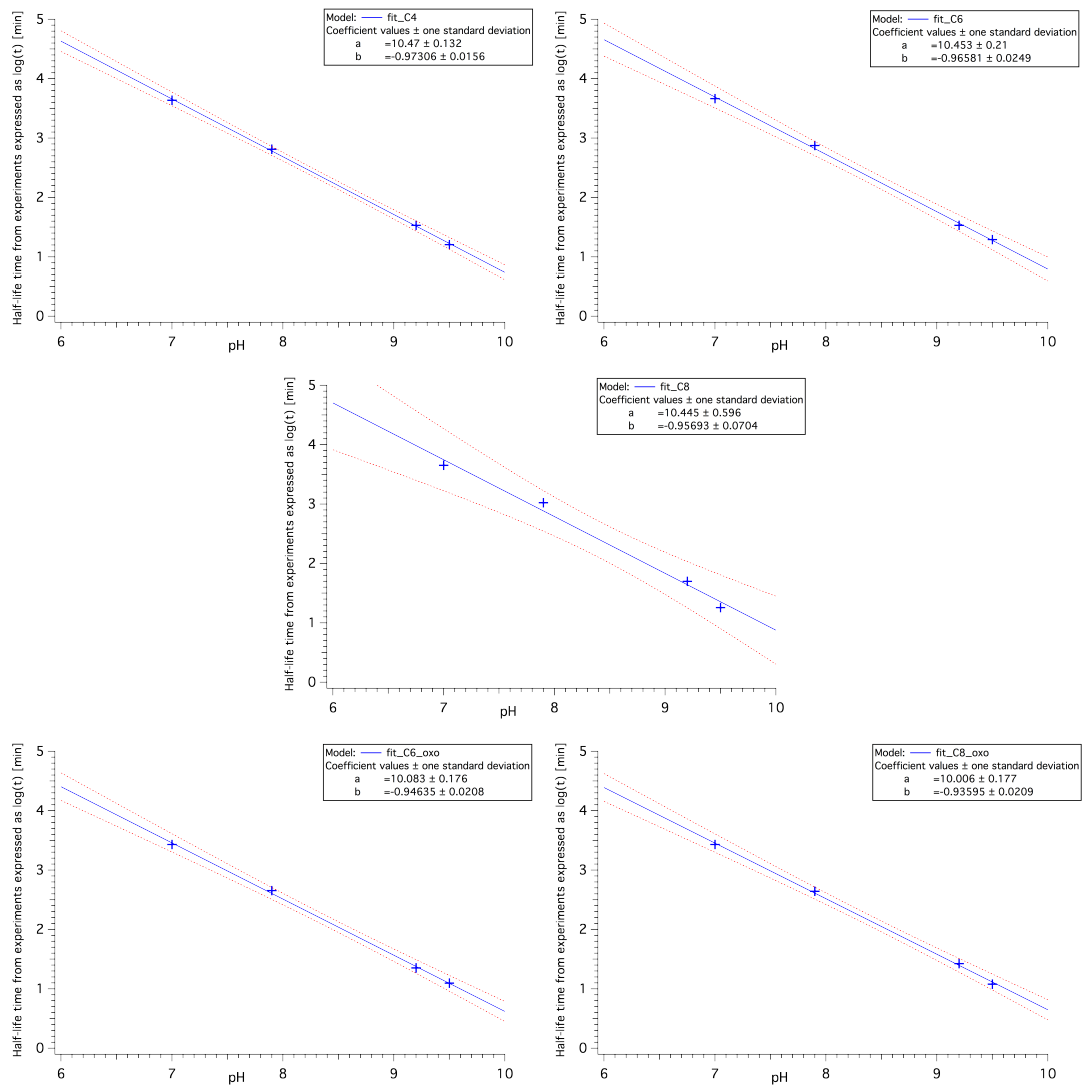

785 **Figure S5: Half-life time – pH - based on experimental values at 22°C by**  
786 **Ziegler.**

787

**Table S6: Coefficients ( $\pm$  SD) of the relationship between hydrolysis rate  $k$  or half-life time  $t_{1/2}$  and pH for the combined dataset adjusted to H<sub>2</sub>O and 26°C.  $k$ -pH relation is expressed as linear equation of the form  $-\log(k) = a \times \text{pH} + C$  and  $t_{1/2}$ -pH relation is expressed as linear equation of the form  $\log(t_{1/2}) = b \times \text{pH} + D$ . Both are valid for the pH range from 6.0 to 10.0.  $R^2$  expresses the goodness of fit of the linear regression.**

| AHL | Hydrolysis rate $k$ |               |       | Half-life time $t_{1/2}$ |               |       |
|-----|---------------------|---------------|-------|--------------------------|---------------|-------|
|     | $a$                 | $C$           | $R^2$ | $b$                      | $D$           | $R^2$ |
| C6  | -0.81 $\pm$ 0.07    | 9.0 $\pm$ 0.5 | 0.955 | -0.81 $\pm$ 0.07         | 8.9 $\pm$ 0.5 | 0.955 |
| C8  | -0.77 $\pm$ 0.06    | 8.9 $\pm$ 0.5 | 0.966 | -0.77 $\pm$ 0.05         | 8.7 $\pm$ 0.5 | 0.966 |

## References

788

- 789 (1) I. P. on Climate Change, *IPCC Special Report on the Ocean and Cryosphere in a*  
790 *Changing Climate*, IPCC, 2019.
- 791 (2) C. C. Roggatz, M. Lorch, J. D. Hardege and D. M. Benoit, *Global Change Biology*,  
792 2016-12-01, **22**, 3914–3926.
- 793 (3) C. C. Roggatz, N. Fletcher, D. M. Benoit, A. C. Algar, A. Doroff, B. Wright,  
794 K. C. Wollenberg Valero and J. D. Hardege, *Nature Climate Change*, 2019-10-07,  
795 **9**, 840–844.
- 796 (4) C. S. Porteus, P. C. Hubbard, T. M. Uren Webster, R. van Aerle, A. V. M. Canário,  
797 E. M. Santos and R. W. Wilson, *Nature Climate Change*, 2018-08, **8**, 737–743.
- 798 (5) Z. Velez, C. C. Roggatz, D. M. Benoit, J. D. Hardege and P. C. Hubbard, *Frontiers*  
799 *in Physiology*, 2019-07-03, **10**, 731.
- 800 (6) A. W. Decho, *Continental Shelf Research*, 2000, **17**.
- 801 (7) R. O. Anderson, *AIMS Microbiology*, 2016, **2**, 304–331.
- 802 (8) S. Dobretsov, M. Teplitski and V. Paul, *Biofouling*, 2009-03-19, **25**, 413–427.
- 803 (9) L. Gram, H.-P. Grossart, A. Schlingloff and T. Kiørboe, *Applied and Environmen-*  
804 *tal Microbiology*, 2002-08, **68**, 4111–4116.
- 805 (10) R. Lami, in *Quorum Sensing*, Elsevier, 2019, pp. 55–96.
- 806 (11) J. Antunes, P. Leão and V. Vasconcelos, *Environmental Microbiology Reports*,  
807 2019-06, **11**, 287–305.
- 808 (12) A. W. Decho, P. T. Visscher, J. Ferry, T. Kawaguchi, L. He, K. M. Przekop, R. S.  
809 Norman and R. P. Reid, *Environmental Microbiology*, 2009-02, **11**, 409–420.
- 810 (13) K. Tait, H. Williamson, S. Atkinson, P. Williams, M. Cámara and I. Joint, *Envi-*  
811 *ronmental Microbiology*, 2009-07, **11**, 1792–1802.
- 812 (14) F. Stock, E. Cirri, S. G. L. I. Nuwanthi, W. Stock, N. Ueberschaar, S. Mangelinckx,  
813 G. Pohnert and W. Vyverman, *Limnology and Oceanography: Methods*, 2021-02,  
814 **19**, 145–157.



- 815 (15) P. Williams, *Microbiology*, 2007-12-01, **153**, 3923–3938.
- 816 (16) C. Yang, S. Fang, D. Chen, J. Wang, F. Liu and C. Xia, *Marine Pollution Bulletin*,  
817 2016-06, **107**, 118–124.
- 818 (17) K. Tait, I. Joint, M. Daykin, D. L. Milton, P. Williams and M. Camara, *Environ-*  
819 *mental Microbiology*, 2005-02, **7**, 229–240.
- 820 (18) I. Joint, K. Tait and G. Wheeler, *Philosophical Transactions of the Royal Society*  
821 *B: Biological Sciences*, 2007-07-29, **362**, 1223–1233.
- 822 (19) K. Tait and J. Havenhand, *Molecular Ecology*, 2013-05, **22**, 2588–2602.
- 823 (20) Y.-L. Huang, S. Dobretsov, J.-S. Ki, L.-H. Yang and P.-Y. Qian, *Microbial Ecology*,  
824 2007-07-31, **54**, 384–392.
- 825 (21) S. Chhabra, B. Phillip, L. Eberl, P. Williams and M. Cámara, in *Chemistry*  
826 *of Pheromones and Other Semiochemicals 2*, Edited by Stefan Schulz, Springer,  
827 Berlin/Heidelberg, 2005, pp. 279–315.
- 828 (22) E. A. Yates, B. Philipp, C. Buckley, S. Atkinson, S. R. Chhabra, R. E. Sockett,  
829 M. Goldner, Y. Dessaux, M. Camara, H. Smith and P. Williams, *Infection and*  
830 *Immunity*, 2002-10-01, **70**, 5635–5646.
- 831 (23) L. Hmelo and B. Van Mooy, *Aquatic Microbial Ecology*, 2009-02-04, **54**, 127–133.
- 832 (24) I. Joint, *Science*, 2002-11-08, **298**, 1207–1207.
- 833 (25) L. R. Hmelo, *Annual Review of Marine Science*, 2017-01-03, **9**, 257–281.
- 834 (26) A. W. Decho and T. Gutierrez, *Frontiers in Microbiology*, 2017-05-26, **8**, 922.
- 835 (27) R. Gómez-Bombarelli, E. Calle and J. Casado, *The Journal of Organic Chemistry*,  
836 2013-07-19, **78**, 6868–6879.
- 837 (28) E. W. Ziegler, A. B. Brown, N. Nesnas and A. G. Palmer, *European Journal of*  
838 *Organic Chemistry*, 2019-05-08, **2019**, 2850–2856.
- 839 (29) H. Baumann, R. B. Wallace, T. Tagliaferri and C. J. Gobler, *Estuaries and Coasts*,  
840 2015-01, **38**, 220–231.
- 841 (30) H. Baumann and E. M. Smith, *Estuaries and Coasts*, 2018-06, **41**, 1102–1117.
- 842 (31) C. C. C. R. de Carvalho, *Frontiers in Marine Science*, 2018-04-11, **5**, 126.
- 843 (32) N. N. C. for Environmental Information, *State of the Climate: Global Climate*  
844 *Report for Annual 2019*, Annual, 2020-01.
- 845 (33) M. Boyer and F. Wisniewski-Dyé, *FEMS Microbiology Ecology*, 2009-10, **70**, 1–19.
- 846 (34) Y.-H. Dong and L.-H. Zhang, *The Journal of Microbiology*, 2005, **43**, 101–109.
- 847 (35) C. Grandclément, M. Tannières, S. Moréra, Y. Dessaux and D. Faure, *FEMS*  
848 *Microbiology Reviews*, 2016-01, **40**, ed. M. Camara, 86–116.
- 849 (36) Y.-H. Dong, J.-L. Xu, X.-Z. Li and L.-H. Zhang, *Proceedings of the National*  
850 *Academy of Sciences*, 2000-03-28, **97**, 3526–3531.

- 851 (37) Y.-H. Dong, A. R. Gusti, Q. Zhang, J.-L. Xu and L.-H. Zhang, *Applied and En-*  
852 *vironmental Microbiology*, 2002-04, **68**, 1754–1759.
- 853 (38) Y.-H. Lin, J.-L. Xu, J. Hu, L.-H. Wang, S. L. Ong, J. R. Leadbetter and L.-H.  
854 Zhang, *Molecular Microbiology*, 2003-01-15, **47**, 849–860.
- 855 (39) C. Mayer, M. Romero, A. Muras and A. Otero, *Applied Microbiology and Biotech-*  
856 *nology*, 2015-11, **99**, 9523–9539.
- 857 (40) T.-N. Wang, Q.-T. Guan, A. Pain, A. H. Kaksonen and P.-Y. Hong, *Frontiers in*  
858 *Microbiology*, 2019-04-17, **10**, 823.
- 859 (41) P. van der Merwe, D. Lannuzel, C. M. Nichols, K. Meiners, P. Heil, L. Norman,  
860 D. Thomas and A. Bowie, *Marine Chemistry*, 2009-08, **115**, 163–175.
- 861 (42) Y. Takeshita, C. A. Frieder, T. R. Martz, J. R. Ballard, R. A. Feely, S. Kram,  
862 S. Nam, M. O. Navarro, N. N. Price and J. E. Smith, *Biogeosciences*, 2015-10-14,  
863 **12**, 5853–5870.
- 864 (43) G. F. Kaufmann, R. Sartorio, S.-H. Lee, C. J. Rogers, M. M. Meijler, J. A. Moss,  
865 B. Clapham, A. P. Brogan, T. J. Dickerson and K. D. Janda, *Proceedings of the*  
866 *National Academy of Sciences*, 2005-01-11, **102**, 309–314.
- 867 (44) J. Wang, Q. Liu, D. Dong, H. Hu, B. Wu and H. Ren, *Water Research*, 2021-04,  
868 **194**, 116925.
- 869 (45) A. W. Decho, R. L. Frey and J. L. Ferry, *Chemical Reviews*, 2011-01-12, **111**,  
870 86–99.
- 871 (46) N. S. Redzuan and P. Milow, *AAEL Bioflux*, 2019, **12**, 8.
- 872 (47) J. Yang, D. Wu, A. Li, H. Guo, H. Chen, S. Pi, W. Wei and F. Ma, *Applied*  
873 *Biochemistry and Biotechnology*, 2016-07, **179**, 728–739.
